# Supplementary material for: Laboratory validation of a clinical metagenomic sequencing assay for pathogen detection in cerebrospinal fluid
Source: HighWire-hosted journal article supplement (doi:10.1101/gr.238170.118), 2019-04-16
Supplement: Supplemental_Material.docx [file Supplemental_Material.docx]

**SUPPLEMENTAL MATERIAL**

**Laboratory Validation of a Clinical Metagenomic Sequencing Assay for Pathogen Detection in Cerebrospinal Fluid**

Miller S#1,2, Naccache SN1,2,3#, Samayoa E1, Messacar K4, Arevalo S1,2, Federman S1,2, Stryke D1,2, Pham E1, Fung B1, Bolosky WJ5, Ingebrigtsen D1, Lorizio W1, Paff SM1, Leake JA6, Pesano R6, DeBiasi RL7,8, Dominguez SR4, and CY Chiu1,2,9*

1Department of Laboratory Medicine, University of California, San Francisco, San Francisco, CA, USA

2UCSF-Abbott Viral Diagnostics and Discovery Center, San Francisco, CA, USA

3Department of Pathology and Laboratory Medicine, Children's Hospital Los Angeles, Los Angeles, California, USA

4Department of Pediatrics, Children's Hospital Colorado and University of Colorado School of Medicine, Aurora, CO, USA

5Microsoft Research, Redmond, WA, USA.

6Quest Diagnostics Nichols Institute, San Juan Capistrano, CA, USA.

7Department of Pediatrics, Division of Pediatric Infectious Diseases, Children’s National Health System, Washington, DC, USA

8Department of Pediatrics, Microbiology, Immunology, and Tropical Medicine, The George Washington University School of Medicine, Washington, D.C., USA

9Department of Medicine, Division of Infectious Diseases, University of California, San Francisco, San Francisco, CA USA

#These authors contributed equally to the manuscript.

**TABLE OF CONTENTS**

**Supplemental Methods ...**.............................................................................................................................. 3

Ethics statement .................................................................................................................................. 3

External controls ................................................................................................................................. 3

Nucleic acid extraction and internal controls ....................................................................................... 4

Enrichment for microbial DNA ............................................................................................................. 4

Enrichment for viral RNA ..................................................................................................................... 5

DNA and RNA sequencing library preparation .................................................................................... 5

Bioinformatics analysis for pathogen detection ................................................................................... 6

Threshold criteria for reporting detected pathogens ............................................................................ 8

Results reporting and visualization ...................................................................................................... 9

Reagent quality control and swipe testing ........................................................................................... 9

Analytical performance of the mNGS assay ........................................................................................ 10

Limits of detection .................................................................................................................... 10

Precision .................................................................................................................................. 10

Accuracy .................................................................................................................................. 10

Interference ............................................................................................................................. 12

Stability .................................................................................................................................... 13

Data access ............................................................................................................................. 13

**Supplemental Tables and Figures** .............................................................................................................. 14

Supplemental Table S1. GC content of the 7 microorganisms in the mNGS assay positive control ... 14

Supplemental Table S2. Accuracy study showing mNGS results relative to reference testing ........... 15

Supplemental Table S3. Challenge study showing mNGS results from 20 CSF samples with

known clinical diagnoses ...................................................................................................................... 15

Supplemental Figure S1. ROC analysis based on 95 samples in the accuracy study ......................... 16

Supplemental Figure S2. mNGS assay interference by human host nucleic acid ............................... 17

**References** ..................................................................................................................................................... 18

**SUPPLEMENTAL METHODS**

**Ethics statement**

CSF samples from patients at UCSF with laboratory confirmed meningitis and/or encephalitis, (diagnosed by direct detection microbiological testing of CSF) and those with suspected neurological infection but testing negative were identified under approved UCSF Institutional Review Board (IRB) biobanking protocol #10-01116. Under this “no subject contact” protocol, retrospective patient chart review was performed to extract associated conventional test results and final microbiological diagnosis for comparision with mNGS results.

For the challenge study, 20 samples from the Aseptic Meningitis and Encephalitis (AMES) study were analyzed by mNGS testing in a blinded fashion. Ethics approval for the AMES study was obtained from the Colorado Multiple IRB (protocol #12-0745), and all subjects provided informed consent for specimen collection and testing.

**External Controls**

Each mNGS assay run included an external positive control (PC) sample and external negative “no-template” control (NTC) sample that were run in parallel with analytical samples for clinical validation and/or testing. The PC consisted of 7 representative organisms with GC content ranging from 35.4% - 57.4% **(Supplemental Table S1**) that were added (“spiked”) into synthetic CSF matrix (Golden West Biologicals Inc.) at concentrations 0.5 to 2 log above limits of detection as follows: DNA virus, CMV (cultured strain from patient at University of California, San Francisco (UCSF), 1000 copies/mL); RNA virus, HIV-1 plasma from positive donor from American Red Cross, 5000 copies/mL); *Streptococcus agalactiae* (ATCC 13813, 50 CFU (colony forming units)/mL); *Klebsiella pneumoniae* (ATCC 13883, 50 CFU/mL; *Cryptococcus neoformans* (ATCC 66031), 1 CFU/mL; *Aspergillus niger* (ATCC 16888), 500 CFU/mL; *Toxoplasma gondii* (ATCC 40050), 50 organisms/mL The composition of the PC mixture included organisms with a broad range of GC content, from 35.4% for *Streptococcus agalactiae* to 57.4% and 57.3% for *Klebsiella pneumoniae* and cytomegalovirus / HHV5 (human herpesvirus 5), respectively **(Supplemental Table S1).** The NTC consisted of elution buffer provided in the EZ1 Virus Mini Kit v2.0 (Qiagen).

**Nucleic acid extraction and internal controls**

PC, NTC and analytical samples were extracted as follows: 600 µL of CSF were processed by bead beating twice at 6 m/s for 30 s each on a FastPrep-24 bead beater (MP Biomedicals), with a 5-minute incubation at 4°C in between bead-beating cycles. Samples were then centrifuged at 2,000 relative centrifugal force for 3 minutes to recover 400 µL of supernatant. Internal DNA and RNA controls, consisting of a DNA phage (Escherichia coli bacteriophage T1, ATCC 11303-B1) and RNA phage (Escherichia coli bacteriophage MS2, ATCC 15597-B1), were then added into the supernatant at a concentration of 3x105 and 9x103 copies/mL, levels which resulted in approximately 1 x 103 RPM in clinical CSF samples. 400 µL of each sample was extracted and eluted with buffer in 60 µL volume using the EZ1 Virus Mini Kit v2.0 (Qiagen) on the EZ1 BioRobot (Qiagen) per the manufacturer’s instructions.

**Enrichment for microbial DNA**

To selectively enrich for microbial DNA (from DNA viruses, bacteria, fungi, and parasites), 25 µL of the total nucleic acid extract was processed using the NEB Microbiome Enrichment Kit (New England Biolabs) per the manufacturer’s instructions. The NEB Microbiome Kit enriches for microbial nucleic acid by selective antibody-mediated depletion of methylated DNA, which is mostly derived from the human host. In a comparison study with and without methylated DNA host depletion using human CSF samples spiked with virus (cytomegalovirus) and bacteria (*Streptococcus agalactiae*), the relative proportion of pathogen relative to human reads was enriched by ~2.5-fold (data not shown).

. A major advantage of molecular detection methods over culture is the ability to detect nonviable (“dead”) or fastidious organisms (Welinder-Olsson et al. 2007). Thus, to enable cell-free DNA detection from both dead (“culture-negative”) as well as live organisms, a propidium monoazide (PMA) treatment step to enrich for live organisms was not performed. Differential lysis, shown previously to increase the proportion of microbial relative to host background read (Hasan et al. 2016) was also not done, as this would likely bias detection towards organisms with cell walls (e.g. some bacteria and fungi) and away from other organisms such as eukaryotic parasites, intracellular viruses, bacteria that lack cell walls (e.g. *Mycoplasma*).

**Enrichment for viral RNA**

To enrich for viral RNA, 25 µL of total nucleic acid extract was treated with 3 µL of Turbo DNAse (Thermo-fisher) and 1 µL Baseline DNase (Epicentre; Illumina) in a 25 µL total reaction that was incubated for 30 minutes at 37oC. RNA was purified and the DNase reaction was stopped using the RNA Clean & Concentrator Kit (Zymo Research). Reverse transcription of the DNase-treated RNA to complementary DNA (cDNA) was then performed. First, 2.5 µM random hexamers (Thermo-Fisher) were added to the 30 µL RNA and incubated 65oC for 5 minutes, followed by reverse transcription in a 50 µL final reaction containing 1x SuperScript III buffer, 1.25mM dNTPs, 5mM DTT and 1 µL of Superscript III enzyme by incubating the mix at 42oC for 30 minutes. After reverse transcription and denaturation of the cDNA/RNA hybrid molecules by 95oC, one cycle of second strand synthesis was performed by addition of 1 µL of Sequenase enzyme (Affymetrix) and incubation at 37oC for 15 min, resulting in the generation of double-stranded cDNA.

**DNA and RNA sequencing library preparation**

DNA resulting from the NEB microbiome kit enrichment step, and cDNA resulting from second strand synthesis were purified using the DNA Clean & Concentrator Kit (Zymo Research) per the manufacturer’s instructions, except that 10 µL of linear acrylamide was added as a carrier, and the reaction was eluted in 7.5 µL. 5 µL of eluate was used to generate libraries using the Nextera XT DNA Library Prep Kit (Illumina, San Diego, CA), with the thermocycling parameters as follows: 95oC 30s / 16 cycles of 95oC 10s, 55oC 30s, 72oC 30s/ 72oC 5 minutes. Dual indexed 8 base pair (bp) barcodes were used in a 24x24 arrangement such that a barcode combination only repeats once every 576 libraries.

Libraries were purified using AMPure XP beads (Beckman Coulter) at 0.9x concentration relative to the library, washed twice with 75% ethanol and eluted in 12 µL water. To ensure adequate library concentrations, a second round of PCR amplification was then performed using 5 µL of library eluate, 0.2mM dNTP, 0.5 µL Phusion enzyme (Thermo-Fisher), and primers targeting the P5 and P7 Illumina adapter sequences (P5, F 5’-AATGATACGGCGACCACCGA-3’; P7, 5’-CAAGCAGAAGACGGCATACG-3’). Thermocycling parameters were as follows: 95oC 30s / 10 cycles of 95oC 10s, 60oC 30s, 72oC 30s/ 72oC 5 minutes. The resulting reaction was purified using AMPure XP beads as described above and eluted in 20 µL water.

For pooling, each library was quantified individually using the Qubit dsDNA HS Assay Kit, followed by combining equimolar concentrations of either DNA libraries or RNA libraries (generated from cDNA) consisting of clinical samples and external positive and negative controls. The size distribution of the combined pools was determined using the High Sensitivity DNA kit (Agilent) on an Agilent 2100 Bioanalyzer with a target range of 150 bp to 2000 bp. Pools were then loaded onto a Illumina HiSeq 1500 sequencer for 140 cycles of single-end sequencing in rapid run mode to generate a minimum of 5 million reads for each library. Some of the early sequencing data used for validation was generated on an Illumina MiSeq instead of a HiSeq instrument.

**Bioinformatics analysis for pathogen detection**

Detection of pathogens was performed by sequence analysis of mNGS data using SURPI+, an automated clinical version of the SURPI (“sequence-based ultra-rapid pathogen identification”) research pipeline (Naccache 2014). The steps of the SURPI+ pipeline consisted of (1) pre-processing for trimming of adapters and removal of low-complexity and low-quality reads, (2) human host background subtraction, (3) alignment to the National Center for Biotechnology Information (NCBI) GenBank nt (nucleotide) reference database for microbial identification, (4) taxonomic classification of aligned reads, and (5) visualization and interpretation of sequencing data. Optimization of bioinformatic processing steps and algorithm parameters was performed using data generated from control samples and *in silico* datasets to maximize sequence reads correctly assigned to individual species taxa (Schlaberg et al. 2017). Briefly, raw reads were assigned to barcodes corresponding to individual samples, with a mismatch tolerance of 0, and then preprocessed by trimming of adapters and low-quality sequences using cutadapt v1.2.1 (<https://pypi.python.org/pypi/cutadapt/1.2.1>) with a quality score cutoff of 18, and low-complexity regions using the dust method in PRINSEQ-lite 0.20.3 (<http://prinseq.sourceforge.net/>) at a threshold cutoff of 7. Subtraction of human background reads was performed by serial nucleotide alignments using SNAP v1.0 (<http://snap.cs.berkeley.edu/>) with edit distance of 18, followed by bowtie2 v2.2.9 (<http://bowtie-bio.sourceforge.net/bowtie2/index.shtml>) using “very-sensitive-local” mode against a reference database incorporating the human genome GRCh38 build and all sequences in GenBank annotated as order Primates as of March 2015. Remaining reads were aligned using SNAP v1.0 with edit distance of 16 for viruses and 1 for bacteria, fungi, and parasites to a modified National Center for Biotechnology Information (NCBI) NT (nucleotide) database (March 2015 build) with sequences annotated as “primate”, “synthetic”, “plasmid”, and “uncultured” removed.

SURPI+ uses UCSF-developed algorithms for taxonomic classification, filtering, and establishment of thresholds for positive detection of pathogens. Following alignment, a taxonomic classification scheme based on the lowest common ancestor was used to assign reads identified as microbial to the species, genus, or family level. A filtering procedure was then performed to remove false-positive virus identifications arising from misannotations in GenBank. Specifically, virus hits (viral reference sequences with at least one read aligning to them) were filtered by (1) selection of the top matched read for each virus hit, (2) BLASTN alignment of the top matched reads to NCBI NT (March 2015 build) using an e-value cutoff of 10-8, and (3) retention of the virus hit only if the most significant alignment corresponded to a viral reference sequence.

Visualization of automated coverage maps was necessary to report positive viral results (see below). Thus, an algorithm was developed for selecting the optimal reference sequence to use as a scaffold for coverage map generation. For each microbial species hit, up to 1000 of the most significant reference sequence alignments are scored by coverage and identity. Coverage is defined as the number of base positions with one or more reads. Identity is defined as the sum of the number of reads with a matching nucleotide divided by the total number of reads at each base position. The percent identity is then calculated by dividing the identity by coverage. A combined score is calculated by adding reference sequence length to identity and multiplying the sum by percent identity. The reference sequence with the highest combined score is chosen as the optimal reference sequence. Coverage maps are then generated by mapping all relevant family, genus, and species-level reads to the optimal reference sequence using lastz v1.03.73 (<http://www.bx.psu.edu/miller_lab/dist/README.lastz-1.02.00/README.lastz-1.02.00a.html>).

**Threshold criteria for reporting detected pathogens**

Criteria used for pathogen detection were established *a priori* based on ROC curve data, and then mNGS analytical performance measures were assessed on the basis of those criteria. 95 clinical CSF samples (73 positive and 22 negative) with known results (79 positive and 137 negative across 5 organism categories, described in more detail in “Accuracy” section below) were used as a training set to determine reporting thresholds based on sequence data. For viruses, we varied the total number of reads and genomic coverage and for bacteria, fungi and parasites we varied the RPM ratio (RPM-r) and compared the resulting mNGS data set to the clinical results for these samples. Receiver-operating characteristic (ROC) curves were plotted to assess the optimal threshold values. The parameters resulting in the maximal Youden’s index were used to determine the optimal thresholds for non-viral organism reporting from mNGS data.

For reporting of a detected virus, at least 3 viral reads spanning at least 3 non-overlapping regions of the most closely matched reference sequence as visualized on the coverage map had to be present. RNA viruses were reported on the basis of viral hits from RNA libraries, and DNA viruses reported on the basis of hits from DNA libraries. Detected viruses were tagged in SURPI+ on the basis of host range annotations provided by the International Committee on Taxonomy of Viruses (ICTV) and maintained as part of the NCBI Taxonomy database (Federhen 2012; Lefkowitz et al. 2018). Viruses corresponding to human endogenous retroviruses, plant, amoeba, bacterial, fungal, algal, archaeal, insect hosts, or in families corresponding to known skin commensals (e.g. papillomaviruses and anelloviruses), reagent contaminants (mouse gammaretroviruses) (Zheng et al. 2011; Wilson et al. 2016), or exclusively insect hosts (e.g. baculoviruses and cripaviruses) were not reported. We also maintained a database of viral contaminants seen in the NTC or PC. Viral contaminants corresponding to pathogenic viruses were kept in the database for 45 days, whereas those corresponding to non-pathogenic viruses were kept indefinitely. Detected viruses found to be present in the viral contaminant database were flagged for review by the laboratory director.

For reporting of detected bacteria, fungi, and parasites, only reads from DNA libraries, aligned at high stringency (edit distance of 1 using the SNAP algorithm (Naccache et al. 2014)) were considered. A positive detection was reported for a given species or genus if the reads per million (RPM) ratio, or RPM-r was ≥10, where the RPM-r was defined as the RPMsample/ RPMNTC (the RPM corresponding to a given species or genus in the clinical sample divided by the RPM in the NTC). When microbial classifications had fewer than 1 RPM to the given species or genus in the NTC, the RPMNTC was set to 1 to avoid “division-by-zero” errors. Occasionally, multiple bacterial genera (≥2) were detected in a CSF sample above the pre-established 10 RPM-r threshold. Detected genera consisted of predominantly environmental and/or skin flora of low pathogenic potential and corresponding cultures were negative (**Supplemental Table S2**), indicating sample contamination as the likely source for these findings.

**Results reporting and visualization**

mNGS result summaries were automatically generated in SURPI+ in Excel spreadsheet format (**Figure 3A)** and reviewed by a laboratory physician for sign-out and entry into the patient electronic medical record. We developed a web-based graphical user interface called SURPI*viz* to provide visualization tools that could be used during sign-out to verify provisional hits. The visualization tools comprising SURPI*viz* included heat maps (**Figure 3B)**, Krona plots (Ondov et al. 2011), and coverage maps (**Figure 3C)**; other resources included automatic downloading and online BLAST alignment of user-selected sequences and consensus genomic sequences in FASTA format. These visualization tools are used by laboratory physicians to prepare a clinical results report that is submitted to the patient electronic medical record (EMR) **(Figure 3D).**

**Reagent quality control and swipe testing**

New lots of laboratory reagents and kits were assessed prior to testing clinical samples using positive and negative control material to ensure adequate activity and purity. Swipe tests of laboratory surfaces in the pre- and post-amplification areas were performed on a monthly schedule (or if contamination is detected on a given run) using sterile cotton swabs dipped in sterile water to assess surface contamination. If the results showed detection of pathogenic organisms or unexpected environmental flora, reagents were rejected or surfaces were decontaminated with 10% sodium hypochlorite until repeat testing demonstrated the absence of pathogen nucleic acid.

**Analytical performance of the mNGS assay**

**Limits of detection**

All 7 positive control organisms were spiked simultaneously into synthetic CSF matrix at concentrations ranging from 0.005 to 5000 genome equivalents/mL across a minimum 4-log dilution range per organism. RNA and DNA libraries were constructed and sequenced across a total of 7 MiSeq and 6 HiSeq runs. Assay LOD were calculated in SPSS (IBM) using probit regression analysis as the concentration at which organism was successfully detected in 95% of replicates, with at least 3 replicates performed at each tested concentration.

**Precision / Reproducibility**

External PC and NTC samples were analyzed over 20 independent mNGS runs (inter-run reproducibility) and as 3 independent sets over 1 run (intra-run reproducibility) and evaluated for quality control metrics and organism detection using established thresholds. Criteria for successful control results included recovery of DNA and RNA IC reads greater than 100 RPM and detection of all 7 organisms in the PC sample.

Replicates of patient CSF samples were not available for evaluation of reproducibility due to limited volume.

**Accuracy**

Residual CSF samples (n=95) from hospitalized patients and contrived samples spiked at predefined concentrations with clinically relevant cultured organisms or patient isolates (n=5) were used to evaluate accuracy. Tested organisms included *Neisseria meningitidis* (ATCC 13090, 100 CFU/mL), *Streptococcus agalactiae* (de-identified patient isolate, 100 CFU/mL), *Candida albicans* (ATCC 14053, 100 CFU/mL), *Mycobacterium fortuitum* (de-identified patient isolate, 1000 CFU/mL), and *Mycobacterium abscessus* (de-identified patient isolate, 1000 CFU/mL). Note that mycobacteria were evaluated at higher concentrations since it was not possible to reliably prepare more dilute suspensions due to organism clumping. Patient CSF samples harbored a wide spectrum of central nervous system (CNS) pathogens (**Table S2**) and included samples from UCSF (n=59), Children’s National Medical Center (n=19), Children’s Hospital Colorado (n=1), and Quest Diagnostics (n=16). Patient samples were stored at -80oC prior to testing. All samples and ancillary clinical and laboratory data used for the accuracy study were either de-identified or collected under protocols approved by the local institution’s Institutional Review Board (IRB).

mNGS test results were compared to conventional microbiological CSF testing (culture, PCR, antigen testing, serology) results, obtained from the patient electronic medical record. Cases with serologic diagnosis based on positive CSF or serum IgM testing for West Nile virus (n=4) and CSF IgG testing for *Taenia solium* (n=1) were included and considered as positive results for comparsion. Cases with very high (>500,000 IU or copies/mL) viral loads in blood for HIV (n=2) and HCV (n=1) were considered to be highly likely to have virus in CSF and were also considered as positive results for comparison. Any discrepancies between mNGS and conventional microbiology testing were evaluated using orthogonal clinical tests sent to outside reference laboratories, provided remaining sample was available (**Supplemental Table S2**), with the results of orthogonal testing taken to be correct. If sample was not available for confirmatory testing, the original clinical result was presumed to be correct.

Due to the varying number of clinical tests performed per sample and limited residual CSF volume, we generated 3 composite reference standards for purposes of comparison **(Figure 2B)**. The first composite standard consisted of the original clinical test results (both positive and negative) from the patient’s diagnostic workup, providing an assessment of mNGS sensitivity and specificity relative to conventional clinical testing. If mNGS detected an organism that had not been tested for clinically, the initial result was considered “reference untested”, and that result was excluded from the comparison, as it could not be determined whether the mNGS result was a true or false positive. Negative clinical results corresponding to each of 5 pathogen categories (i.e. DNA virus, RNA virus, bacterium, fungus, or parasite) were aggregated to produce a single clinical comparison with mNGS for each category (comparisons were excluded if no clinical testing for pathogens within that category had been performed). A second composite standard consisted of combined results from the original clinical testing and additional discrepancy testing of initial false-negative or false-positive samples for which sufficient residual CSF volume was available. Finally, a third composite standard was generated, which excluded samples with high human host background (n=26 of 95, 27.4%), defined as samples with phage IC sequence recovery below a pre-established 100 RPM threshold.

Sensitivity and specificity of the mNGS assay were calculated relative to prior clinical testing, whereas positive percent agreement (PPA) and negative percent agreement (NPA) were calculated only after discrepancy testing was performed (**Table 1 and Figure 2B**). PPA and NPA were also calculated after removal of samples with high levels of host background (see Interference section).

**Interference**

To evaluate the effect of human host DNA and RNA background on mNGS assay performance, we spiked low (1 x 104 cells/mL), medium (1x105 cells/mL), and high (1x106 cells/mL) titers of a human DNA standard (Human DNA for Whole-Genome Variant Assessment, NIST-8398, ATCC) and a human RNA standard (Human Brain Total RNA, Life Technologies) into the PC, To evaluate the effect of hemolysis, we spiked hemolytic blood (that had been lysed by 3 freeze/thaw cycles) from expired donor RBC units at 1:2, 1:100, and 1:400 dilutions into synthetic CSF matrix (Golden West Biologicals), which was then further combined with the PC at a 1:2 dilution to simulate high (dark red), medium (light red), and low (light pink) hemolysis levels, respectively. For all interfering substances, we compared mNGS testing results from the spiked PC samples those obtained from running the PC alone.

The effect of CSF WBC on recovery of IC reads was analyzed using data from the CSF samples obtained from the accuracy study. Median WBC counts from CSF samples with IC reads ≤ 100 RPM were compared to those with IC reads > 100 RPM using Fisher’s exact test.

To evaluate the effect of mixed species from related organisms in the same genus on the ability of the assay to properly classify pathogens, we spiked negative CSF matrix with two bacteria to yield similar RPM ratios (*Staphylococcus aureus* (500 CFU/mL) and *Staphylococcus epidermidis* (10,000 CFU/mL). The S. epidermidis required a much higher concentration to yield similar RPM ratio due to the approximately 20-fold higher level of background *S. epidermidis* reads seen in the NTC compared to *S. aureus* NTC reads. These samples were mixed at ratios of 1:1, 4:1, and 1:4 with organism detection by mNGS compared to the input amounts.

**Stability**

To assess stability, replicates of the external PC were thawed and placed in a refrigerator at 4°C for 2, 5 and 6 days. In addition, external PC samples and corresponding nucleic acid extracts were subjected to 3 freeze/cycles. After these manipulations, mNGS libraries were generated from the samples and sequenced.

**SUPPLEMENTAL TABLES AND FIGURES**

**Supplemental Table S1. GC content of the 7 microorganisms in the mNGS assay positive control.** Abbreviations: UCSF, University of California, San Francisco; NCBI, National Center for Biotechnology Information; *, whole genome of the specific strain not sequenced, so GC content was estimated from a different fully sequenced strain in NCBI GenBank.

**Supplemental Table S2 (“Supplemental_Table_S2.xlsx”, in Microsoft Excel format). Accuracy study showing mNGS results relative to reference testing.** Results are parsed by pathogen type.

**Supplemental Table S3 (“Supplemental_Table_S3.xlsx”, in Microsoft Excel format).**  **Challenge study showing mNGS results from 20 CSF samples with known clinical diagnoses.** mNGS results were obtained from 9 successive clinical mNGS runs.

**
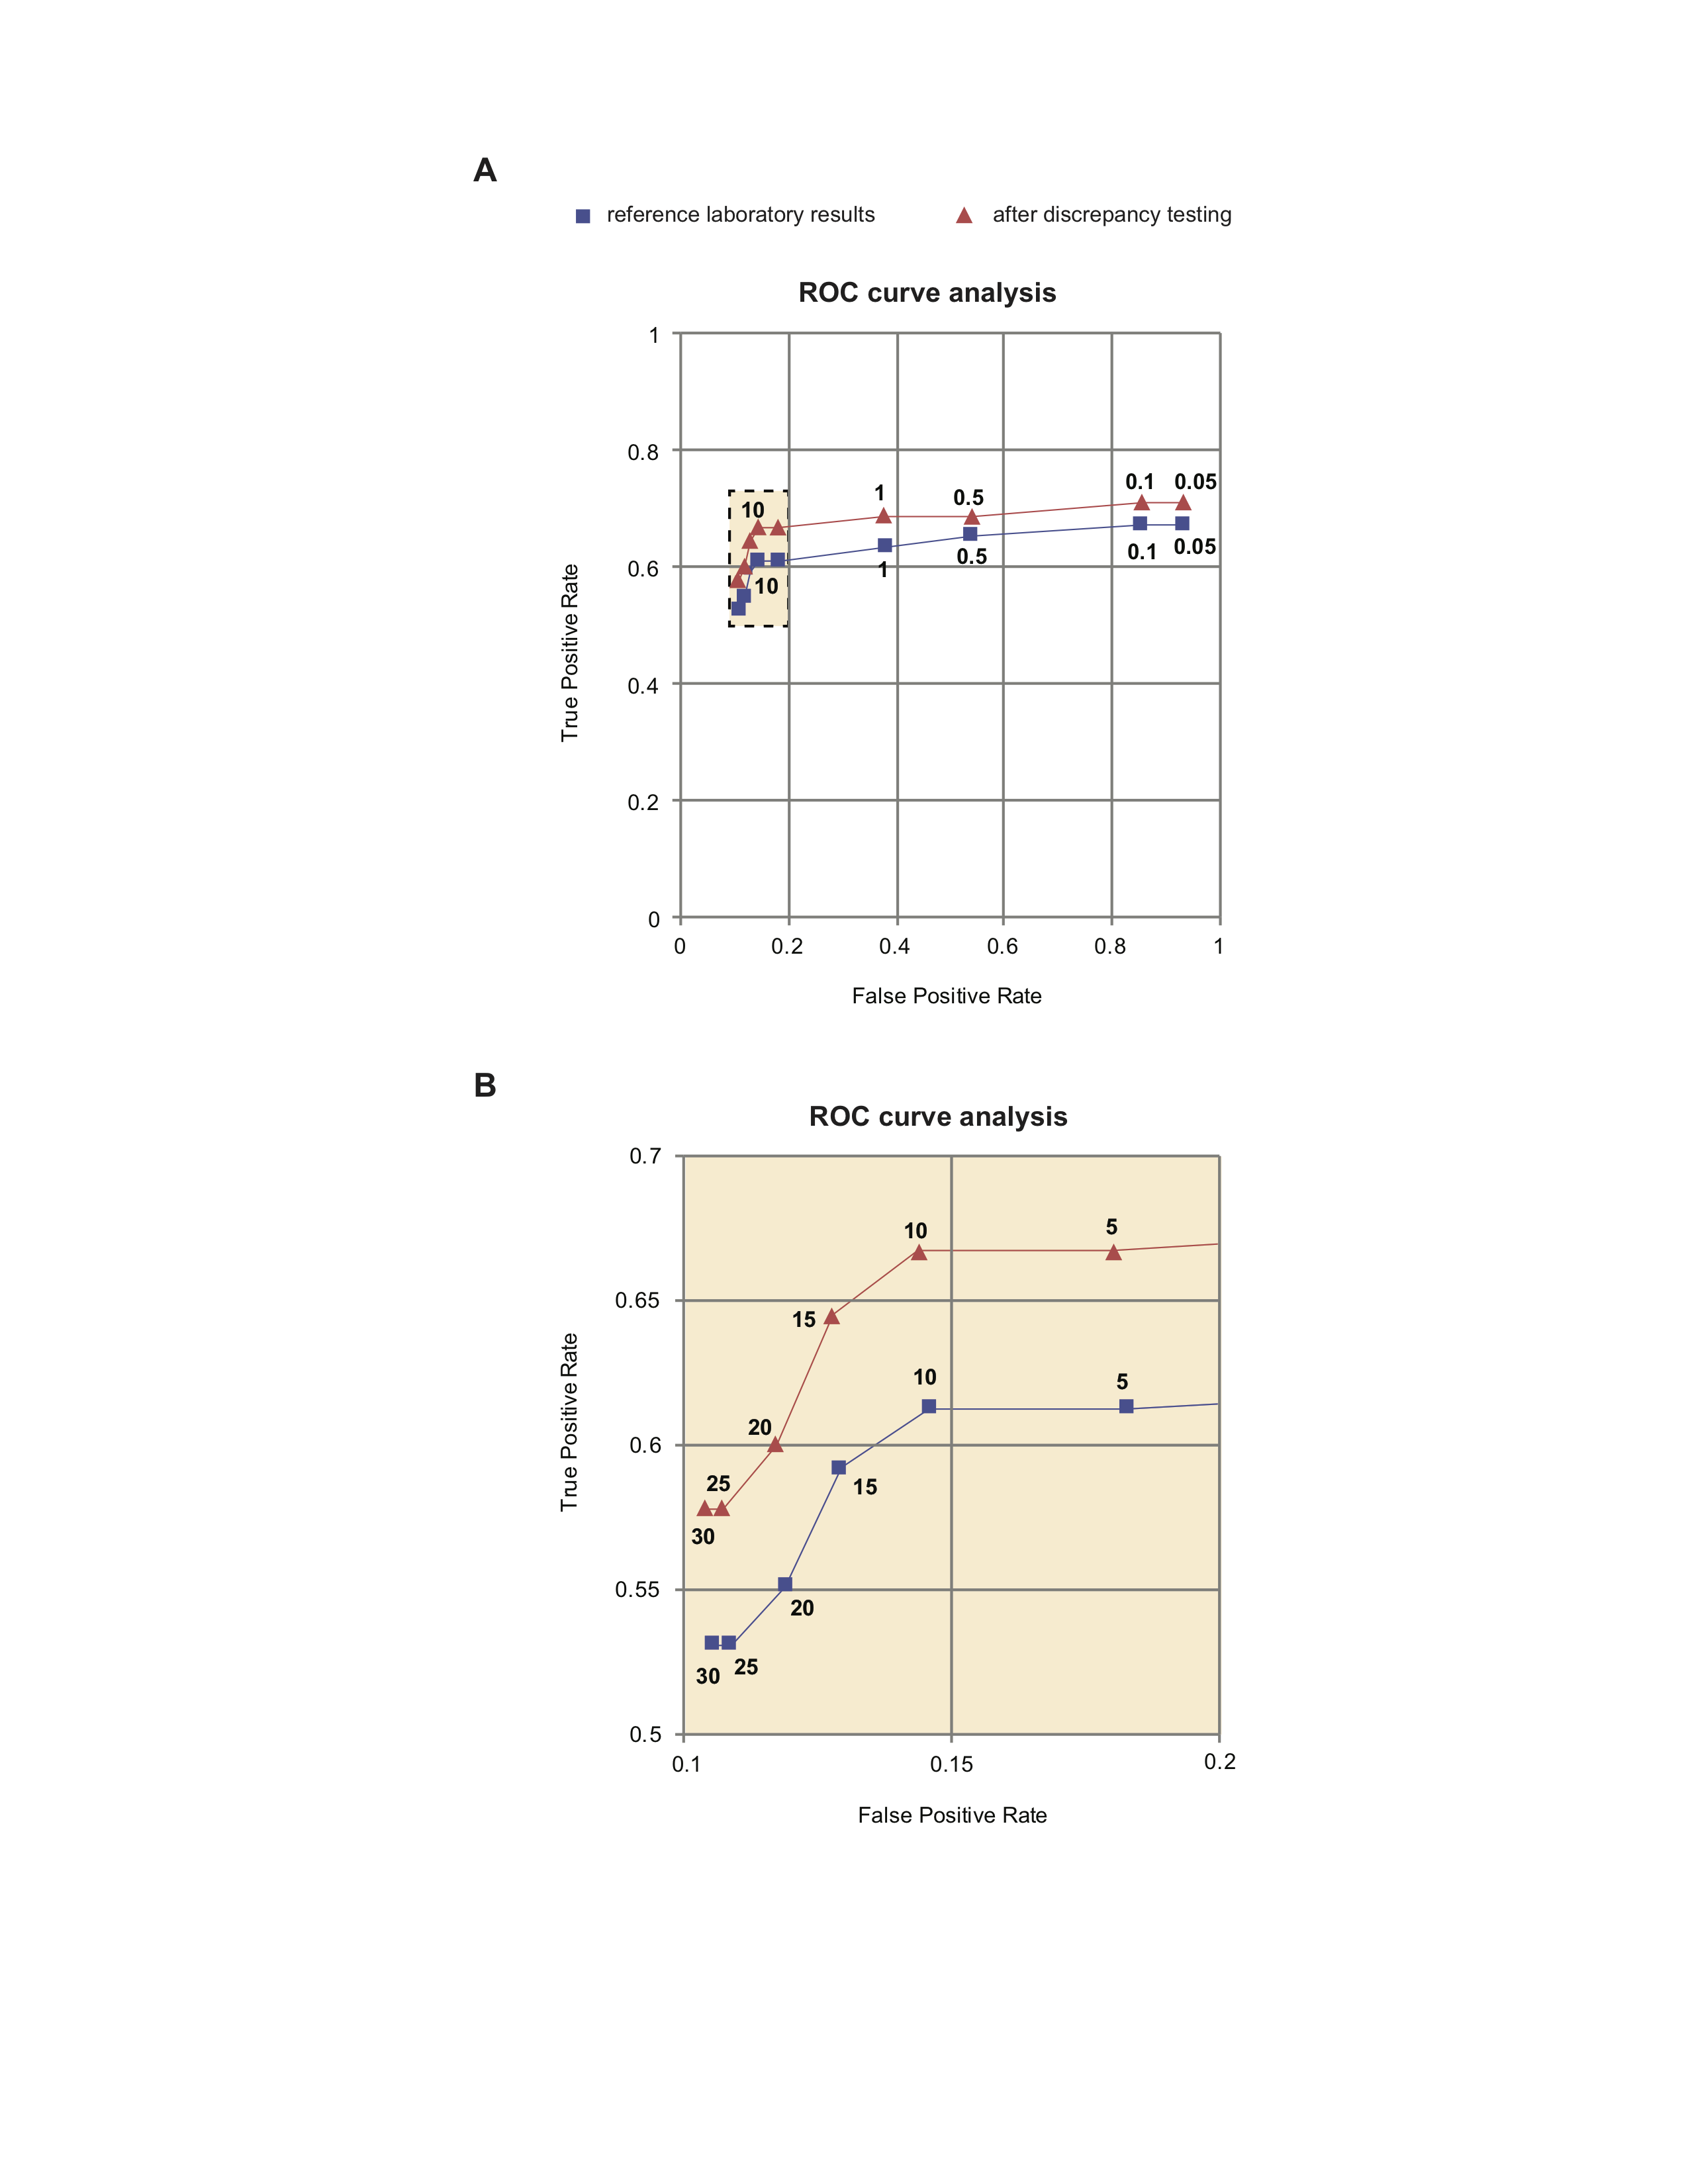
**

**Supplemental Figure S1. Receiver Operator Curve (ROC) analysis based on 95 samples in the accuracy study.** **(A)** ROC analysis based on initial clinical testing results showing that the optimal threshold for mNGS detection is an RPM-r of 10. **(B)** ROC analysis based on initial clinical followed by discrepancy testing showing that the optimal threshold level for detection remains an RPM-r of 10. The true positive rate (sensitivity) is plotted on the y axis against the false positive rate (1-specificity) on the x axis, and RPM-r values are shown next to their corresponding points on the graph.

**Supplemental Figure S2. mNGS assay interference by human host nucleic acid.** PC samples were spiked in with quantified human DNA or RNA to assess mNGS assay sensitivity in the presence of background. Addition of RNA is noted to have relatively little impact on the number of IC phage reads recovered, but addition of excess DNA reduces IC phage recovery in DNA libraries. The threshold for designating a sample as high background (IC phage reads ≤ 100 RPM) is shown. 1

**References**

Federhen S. 2012. The NCBI Taxonomy database. *Nucleic Acids Res* **40**: D136-143.

Lefkowitz EJ, Dempsey DM, Hendrickson RC, Orton RJ, Siddell SG, Smith DB. 2018. Virus taxonomy: the database of the International Committee on Taxonomy of Viruses (ICTV). *Nucleic Acids Res* **46**: D708-D717.

Naccache SN, Federman S, Veeraraghavan N, Zaharia M, Lee D, Samayoa E, Bouquet J, Greninger AL, Luk KC, Enge B et al. 2014. A cloud-compatible bioinformatics pipeline for ultrarapid pathogen identification from next-generation sequencing of clinical samples. *Genome Res* **24**: 1180-1192.

Ondov BD, Bergman NH, Phillippy AM. 2011. Interactive metagenomic visualization in a Web browser. *BMC Bioinformatics* **12**: 385.

Schlaberg R, Chiu CY, Miller S, Procop GW, Weinstock G, Professional Practice Committee and Committee on Laboratory Practices of the American Society for Microbiology, Microbiology Resource Committee of the College of American Pathologists. 2017. Validation of Metagenomic Next-Generation Sequencing Tests for Universal Pathogen Detection. *Arch Pathol Lab Med* **141**: 776-786.

Wilson MR, Fedewa G, Stenglein MD, Olejnik J, Rennick LJ, Nambulli S, Feldmann F, Duprex WP, Connor JH, Muhlberger E et al. 2016. Multiplexed Metagenomic Deep Sequencing To Analyze the Composition of High-Priority Pathogen Reagents. *mSystems* **1**.

Zheng H, Jia H, Shankar A, Heneine W, Switzer WM. 2011. Detection of murine leukemia virus or mouse DNA in commercial RT-PCR reagents and human DNAs. *PLoS One* **6**: e29050.
