# Supplementary material for: Laboratory validation of a clinical metagenomic sequencing assay for pathogen detection in cerebrospinal fluid
Source: HighWire-hosted journal article supplement (doi:10.1101/gr.238170.118), 2019-04-16
Supplement: Supplemental_Table_S2.xlsx [file Supplemental_Table_S2.xlsx]

## Sheet: Supp Table S2 Legend
Supplemental Table S2 (“Supplemental_Table_S2.xlsx”, in Microsoft Excel format ). Accuracy study showing mNGS results relative to reference testing. Results are parsed by pathogen type.
Bold / Bold = Clinically significant result
Green = Correlation of clinical result or confirmatory result with mNGS result
Red = Discrepancy between clinical result or confirmatory result and mNGS result
Abbreviations: ND: Not Detected, NT: Not Tested, Pos: Positive, Neg: Negative, RR:Reference range, Bact: Bacterial, Cx: culture, cp: copies, IU: International Units, Ab: antibody, RPR: rapid plasma reagin, VDRL: venereal disease research laboratory, CrAg: cryptococcal antigen, CSF: cerebrospinal fluid, TP: true positive, FP: false positive, FN: false negative, TN: true negative, PPA: positive per…
RNA virus abbreviations: HCV: Hepatitis C virus, HIV: Human immunodeficiency virus, WNV: West Nile virus, EV: Enterovirus, JEV: Japanese encephalitis virus
DNA virus abbreviations: HSV: Herpes simplex virus, VZV: Varicella zoster virus, EBV: Epstein-Barr virus, CMV: Cytomegalovirus, HHV6: Human herpesvirus 6, HHV&7: Human herpesvirus 7, HHV8: Human herpesvirus 8, JCV: JC virus, BKV: BK virus
Bacteria abbreviations: S. aureus: Staphylococcus aureus, E. faecium: Enterococcus faecium, K. pneumoniae: Klebsiella pneumoniae, S. pneumoniae: Streptococcus pneumoniae, E. gallinarum: Enterococcus gallinarum, P. mirabilis: Proteus mirabilis, S. epidermidis: Staphylococcus epidermidis, S. marcescens: Serratia marscens, P. aeruginosa: Pseudomonas aeruginosa, K. oxytoca: Klebsiella oxytoca, E. col…
Fungi abbreviations: C. neoformans: Cryptococcus neoformans, C. albicans: Candida albicans, C. krusei: Candida krusei, C. parapsiolsis: Candida parapsilosis, A. fumigatus: Aspergillus fumigatus, S. schenckii: Sporothrix schenckii, C. immitis: Coccidioides immitis, C. tropicalis: Candida tropicalis
Parasite abbreviations: T. gondii: Toxoplasma gondii, T solium: Taenia solium

## Sheet: Supplemental Table S2 Legend
Supplemental Table S2. Accuracy study showing mNGS results relative to reference testing. Results are parsed by pathogen type.

## Sheet: All Organisms
Clinical Test Data		RNA Virus		DNA Virus		Bacteria		Fungi		Parasite		mNGS	Confirmatory Test
Sample ID	#	Result	Method	Result	Method	Result	Method	Result	Method	Result	Method	Result	Result	Method	High Host Background
MNA_088_096	1	894,372 IU/mL	HCV RNA, blood	ND	HSV DNA, CSF	S. aureus, few	Bact Cx, CSF	NT	NT	NT	NT	HCV	NT	NT	Y
		ND	HIV RNA, blood			ND	Lyme Ab, blood						NT	NT	Y
						ND	RPR, blood								Y
MNA_089_097	2	NT	NT	14,200 cp/mL	VZV DNA, CSF	ND	Bact Cx, CSF	ND	Bact Cx, CSF	NT	NT	VZV	NT	NT	N
				ND	HCV DNA, CSF	ND	RPR, blood								N
				ND	CMV DNA, CSF										N
MNA_090_098	3	>1,000,000 cp/mL	HIV RNA, blood	ND	HSV DNA, CSF	ND	Bact Cx, CSF	C. neoformans	Bact Cx, CSF	ND	T. gondii Ab, blood	C. neoformans	NT	NT	N
		ND	HCV Ab, blood	ND	VZV DNA, CSF	ND	VDRL, CSF	Pos >1:1280	CrAg, CSF			HIV	NT	NT	N
				ND	VZV IgM Ab, CSF	ND	RPR, blood	Pos >500	Beta-D-glucan, blood (RR ≤80 pg/mL)						N
MNA_091_099	4	NT	NT	NT	NT	E. faecium, rare	Bact Cx, CSF	ND	Bact Cx, CSF	NT	NT	E. faecium	NT	NT	Y
MNA_092_100	5	Pos 1.21	WNV IgM Ab, blood (RR ≤1.10)	ND	HSV DNA, CSF	ND	Bact Cx, CSF	ND	Fungal Cx, CSF	NT	NT	WNV	NT	NT	N
		ND	WNV IgM Ab, CSF	ND	VZV DNA, CSF	ND	VDRL, CSF	ND	CrAg, CSF						N
		ND	EV RNA, CSF	ND	EBV DNA, CSF			ND	C. immitis Ab by CF, blood						N
				ND	HHV6 DNA, CSF										N
				ND	CMV DNA, blood										N
MNA_093_101	6	NT	NT	HSV1 Pos	HSV DNA, CSF	ND	Bact Cx, CSF	C. albicans	Fungal Cx, CSF	NT	NT	C. albicans	NT	NT	N
				HHV6 Pos	HHV6 DNA, CSF							HSV1	NT	NT	N
												HHV6	NT	NT	N
												CMV	CMV 137 IU/mL	CMV DNA, CSF	N
MNA_125_135	7	Pos 4.13	WNV IgM Ab, CSF (RR ≤1.10)	ND	HSV DNA, CSF	ND	Bact Cx, CSF	ND	Bact Cx, CSF	NT	NT	ND	NT	NT	N
		Pos 2.98	WNV IgG Ab, blood (RR ≤1.10)	ND	VZV DNA, CSF	ND	Lyme Ab, CSF								N
		ND	EV RNA, CSF	ND	EBV DNA, CSF										N
		ND	HCV RNA, blood	ND	CMV DNA, CSF										N
MNA_126_136	8	NT	NT	NT	NT	ND	Bact Cx, CSF	ND	Bact Cx, CSF	NT	NT	ND	NT	NT	N
MNA_127_137	9	NT	NT	NT	NT	K. pneumoniae, numerous	Bact Cx, CSF	ND	Bact Cx, CSF	NT	NT	K. pneumoniae	NT	NT	Y
MNA_128_138	10	NT	NT	ND	EBV DNA, blood	ND	Bact Cx, CSF	C. krusei	Bact Cx, CSF	NT	NT	C. krusei	NT	NT	Y
				ND	Adenovirus DNA, blood	ND	VDRL, CSF	Pos 319	Beta-D-glucan, blood (RR ≤80 pg/mL)	NT	NT				Y
				ND	CMV DNA, blood										Y
				231 cp/mL	HHV6 DNA, blood										Y
				2,840 cp/mL	BKV DNA, blood										Y
MNA_129_139	11	NT	NT	500 cp/mL	VZV DNA, CSF	NT	NT	NT	NT	NT	NT	VZV	NT	NT	N
				ND	VZV IgM Ab, CSF										N
MNA_130_140	12	NT	NT	ND	HSV DNA, CSF	S. pneumoniae, rare	Bact Cx, CSF	ND	CrAg, CSF	NT	NT	S. pneumoniae	NT	NT	Y
						ND	VDRL, CSF								Y
MNA_158_168	13	NT	NT	NT	NT	S. pneumoniae	Bact Cx, CSF	ND	Bact Cx, CSF	NT	NT	S. pneumoniae	NT	NT	N
MNA_160_170	14	NT	NT	ND	HSV DNA, CSF	E. gallinarum, broth only	Bact Cx, CSF	ND	CrAg, CSF	NT	NT	ND	E. gallinarum	Bact 16S PCR, CSF	Y
				ND	HHV6 DNA, blood	ND	AFB Cx, CSF	ND	Fungal Cx, CSF						Y
				ND	HHV7 DNA, blood	ND	RPR, blood	ND	C. immitis Ab by CF, CSF						Y
				ND	HHV8 DNA, blood										Y
MNA_161_171	15	NT	NT	17,700 IU/mL	EBV DNA, CSF	ND	Bact Cx, CSF	ND	CrAg, CSF	ND	T. gondii Ab, CSF	EBV	NT	NT	N
				ND	EBV DNA, blood										N
				ND	HSV DNA, CSF										N
				ND	CMV DNA, CSF										N
				ND	CMV DNA, blood										N
				ND	HHV6 DNA, CSF										N
				ND	JCV DNA, CSF										N
				ND	VZV IgM Ab, CSF										N
				ND	VZV IgG Ab, CSF										N
MNA_191_201	16	NT	NT	NT	NT	ND	Bact Cx, CSF	C. parapsilosis, rare	Bact Cx, CSF	NT	NT	ND	ND	Fungal ITS PCR, CSF	N
MNA_192_202	17	NT	NT	NT	NT	P. mirabilis, rare	Bact Cx, CSF	ND	Bact Cx, CSF	NT	NT	ND	ND	Bact 16S PCR, CSF	Y
MNA_194_204	18	EV Pos	EV RNA, CSF	NT	NT	NT	NT	NT	NT	NT	NT	ND	NT	NT	N
MNA_195_205	19	NT	NT	NT	NT	ND	Bact Cx, CSF	ND	Bact Cx, CSF	NT	NT	Neg (multiple bacterial genera)	NT	NT	N
MNA_197_207	20	Pos 4.70	WNV IgM Ab, CSF (RR ≤1.10)	ND	HSV DNA, CSF	ND	Bact Cx, CSF	ND	Fungal Cx, CSF	NT	NT	ND	ND	WNV RNA, CSF	N
		Pos 2.41	WNV IgG Ab, CSF (RR ≤1.49)	ND	EBV IgM Ab, CSF	ND	AFB Cx, CSF	ND	C. immitis Ab by ID and CF, blood						N
		ND	EV RNA, CSF	ND	VZV DNA, CSF	ND	VDRL, CSF	ND	CrAg, CSF						N
		ND	HIV RNA, blood	ND	EBV DNA, CSF										N
MNA_198_208	21	NT	NT	NT	NT	S. marcescens, numerous	Bact Cx, CSF	ND	Bact Cx, CSF	NT	NT	S. marcescens	NT	NT	Y
MNA_211_221	22	NT	NT	ND	HSV DNA, CSF	ND	Bact Cx, CSF	Pos 1:160	CrAg, CSF	NT	NT	ND	ND	C. neoformans PCR	N
						ND	AFB Cx, CSF	ND	Fungal Cx, CSF						N
						ND	VDRL, CSF								N
MNA_212_222	23	NT	NT	ND	HSV DNA, CSF	ND	Bact Cx, CSF	Pos 1:320	CrAg, CSF	NT	NT	C. neoformans	NT	NT	N
						ND	VDRL, CSF	ND	Bact Cx, CSF			HIV	HIV 1,697 IU/mL	HIV RNA, CSF	N
MNA_213_223	24	NT	NT	NT	NT	S. aureus, moderate	Bact Cx, CSF	ND	Bact Cx, CSF	NT	NT	S. aureus	NT	NT	Y
MNA_215_225	25	NT	NT	600 cp/mL	VZV DNA, CSF	ND	Bact Cx, CSF	ND	Bact Cx, CSF	NT	NT	VZV	NT	NT	N
						ND	VDRL, CSF								N
MNA_216_226	26	NT	NT	NT	NT	ND	Bact Cx, CSF	C. neoformans, rare	Bact Cx, CSF	NT	NT	C. neoformans	NT	NT	N
								Pos 1:160	CrAg, CSF			HIV	NT	NT	N
MNA_217_227	27	NT	NT	NT	NT	P. aeruginosa, rare	Bact Cx, CSF	ND	Bact Cx, CSF	NT	NT	P. aeruginosa	NT	NT	N
MNA_218_228	28	Pos 6.39	WNV IgM Ab, CSF (RR ≤1.10)	ND	HSV DNA, CSF	ND	Lyme Ab, CSF	ND	CrAg, CSF	NT	NT	ND	ND	WNV RNA, CSF	N
		Pos 2.69	WNV IgG Ab, CSF (RR ≤1.49)	ND	VZV DNA, CSF			ND	C. immitis Ab by ID, CSF						N
		Pos 13.7	JEV IgM Ab, blood (RR ≤6.0)	ND	EBV DNA, CSF										N
		ND	JEV IgG Ab, blood	ND	VZV IgM Ab, CSF										N
		ND	EV RNA, CSF	ND	VZV IgG Ab, CSF										N
MNA_231_241	29	NT	NT	ND	CMV DNA, CSF	ND	Bact Cx, CSF	ND	CrAg, CSF	ND	T. gondii IgG Ab, CSF	HIV	HIV 73 IU/mL	HIV RNA, CSF	N
				ND	JCV DNA, CSF	ND	AFB Cx, CSF	ND	Bact Cx, CSF						N
				ND	EBV DNA, CSF										N
MNA_232_242	30	NT	NT	NT	NT	ND	Bact Cx, CSF	NT	NT	NT	NT	Neg (multiple bacterial genera)	NT	NT	N
							Lyme Ab, CSF	ND
MNA_233_243	31	NT	NT	NT	NT	ND	Bact Cx, CSF	NT	NT	NT	NT	Neg (multiple bacterial genera)	NT	NT	N
MNA_235_245	32	NT	NT	NT	NT	K. oxytoca, moderate	Bact Cx, CSF	ND	Bact Cx, CSF	NT	NT	K. oxytoca	NT	NT	Y
MNA_236_246	33	NT	NT	ND	HSV DNA, CSF	ND	Bact Cx, CSF	C. neoformans	Bact Cx, CSF	NT	NT	C. neoformans	NT	NT	N
						ND	VDRL, CSF	Pos >1:1280	CrAg, CSF						N
MNA_237_247	34	ND	WNV IgM Ab, CSF	1,600,000 IU/mL	CMV DNA, CSF	ND	Bact Cx, CSF	ND	Fungal Cx, CSF	ND	T. gondii Ab, blood	CMV	NT	NT	N
		ND	WNV IgG Ab, CSF	ND	EBV DNA, CSF	ND	AFB Cx, CSF	ND	CrAg, CSF			Parvovirus	NT	NT	N
				ND	HHV6 DNA, CSF			ND	C. immitis Ab, CSF						N
				ND	VZV DNA, CSF			ND	Galactomannan Ag, CSF						N
				ND	HSV DNA, CSF			ND	H. capsulatum Ag, blood						N
MNA_238_248	35	NT	NT	NT	NT	S. aureus, rare	Bact Cx, CSF	ND	Bact Cx, CSF	NT	NT	HHV6	HHV6 717,000 cp/mL	HHV6 DNA, CSF	Y
MNA_251_261	36	NT	NT	NT	NT	ND	Bact Cx, CSF	ND	Bact Cx, CSF	NT	NT	Neg (multiple bacterial genera)			N
MNA_252_262	37	NT	NT	7,800 cp/mL	VZV DNA, CSF	ND	Bact Cx, CSF	ND	CrAg, CSF	NT	NT	VZV	NT	NT	N
								ND	Bact Cx, CSF
MNA_253_263	38	>1,000,000 cp/mL	HIV RNA, blood	ND	HHV8 DNA, blood	ND	Bact Cx, CSF	C. neoformans, moderate	Bact Cx, CSF	NT	NT	C. neoformans	NT	NT	N
								Pos >1:1024	CrAg, CSF			HIV	HIV 35,792 IU/mL	HIV RNA, CSF	N
MNA_254_264	39	NT	NT	NT	NT	P. aeruginosa, few	Bact Cx, CSF	ND	Bact Cx, CSF	NT	NT	P. aeruginosa	NT	NT	N
MNA_255_265	40	NT	NT	NT	NT	E. faecalis	Bact Cx, CSF	ND	Bact Cx, CSF	NT	NT	E. faecalis	NT	NT	Y
MNA_256_266	41	NT	NT	ND	VZV IgM Ab, CSF	ND	VDRL, CSF	ND	Fungal Cx, CSF	NT	NT	ND	NT	NT	N
MNA_257_267	42	NT	NT	NT	NT	ND	Bact Cx, CSF	ND	Bact Cx, CSF	NT	NT	ND	NT	NT	N
							Lyme Ab, CSF	ND
MNA_258_268	43	NT	NT	NT	NT	E. coli, few	Bact Cx, CSF	ND	Bact Cx, CSF	NT	NT	ND	NT	NT	Y
MNA_271_281	44	NT	NT	Pos <251 cp/mL	VZV DNA, CSF	ND	Bact Cx, CSF	Pos >7.6	Galactomannan Ag, CSF (RR ≤0.5)	NT	NT	ND	A. fumigatus	Fungal ITS PCR, CSF	Y
				ND	HSV DNA, CSF	ND	AFB Cx, CSF	ND	Fungal Cx, CSF						Y
						ND	VDRL, CSF								Y
MNA_272_282	45	NT	NT	15,700 cp/mL	VZV DNA, CSF	NT	NT	NT	NT	NT	NT	VZV			N
												EBV	Pos Ct 35.16	EBV DNA, CSF	N
MNA_273_283	46	NT	NT	NT	NT	S. aureus, numerous	Bact Cx, CSF	ND	Bact Cx, CSF	NT	NT	S. aureus	NT	NT	Y
MNA_274_284	47	NT	NT	160,000 cp/mL	CMV DNA, CSF	ND	Bact Cx, CSF	ND	Bact Cx, CSF	NT	NT	CMV	NT	NT	N
												Parvovirus	NT	NT	N
MNA_275_285	48	NT	NT	NT	NT	ND	Bact Cx, CSF	S. schenckii	Fungal Cx, CSF	NT	NT	ND	S. schenckii	Fungal ITS PCR, CSF	N
						ND	AFB Cx, CSF	ND	Sporothrix Ab, CSF						N
MNA_276_286	49	NT	NT	NT	NT	P. aeruginosa, rare	Bact Cx, CSF	ND	Bact Cx, CSF	NT	NT	P. aeruginosa	NT	NT	N
MNA_277_287	50	NT	NT	NT	NT	ND	Bact Cx, CSF	NT	NT	NT	NT	ND	NT	NT	N
							Lyme Ab, CSF	ND							N
MNA_278_288	51	NT	NT	NT	NT	ND	Bact Cx, CSF	NT	NT	NT	NT	ND	NT	NT	N
MNA_291_301	52	ND	EV RNA, CSF	ND	HSV DNA, CSF	ND	Bact Cx, CSF	NT	NT	NT	NT	ND	NT	NT	N
MNA_292_302	53	NT	NT	NT	NT	ND	Bact Cx, CSF	NT	NT	NT	NT	ND	NT	NT	N
MNA_293_303	54	ND	EV RNA, CSF	ND	HSV DNA, CSF	ND	Bact Cx, CSF	NT	NT	NT	NT	ND	NT	NT	N
MNA_294_304	55	NT	NT	NT	NT	K. pneumoniae, rare	Bact Cx, CSF	ND	Bact Cx, CSF	NT	NT	K. pneumoniae	NT	NT	Y
MNA_295_305	56	NT	NT	NT	NT	ND	Bact Cx, CSF	C. immitis	Fungal Cx, CSF	NT	NT	C. immitis	NT	NT	N
								Pos 1:4	C. immitis Ab, peritoneal fluid			HHV7	NT	NT	N
MNA_296_306	57	NT	NT	1,400 cp/mL	VZV DNA, CSF	ND	Bact Cx, CSF	ND	Bact Cx, CSF	NT	NT	ND	NT	NT	Y
				Pos 4.1	VZV IgM Ab, CSF										Y
				Pos >4,000	VZV IgG Ab, CSF										Y
				ND	HSV DNA, CSF										Y
MNA_297_307	58	NT	NT	NT	NT	S. epidermidis, moderate	Bact Cx, CSF	ND	Bact Cx, CSF	NT	NT	S. epidermidis	NT	NT	Y
MNA_298_308	59	NT	NT	NT	NT	ND	Bact Cx, CSF	ND	Bact Cx, CSF	Pos 30.89	T. solium IgG Ab, CSF IgG (RR ≤0.50)	T. solium	Positive	T. solium PCR	N
								ND	CrAg, CSF	Pos 3.55	T. solium IgG Ab, serum (RR ≤0.50)
MNA_311_321	60	NT	NT	NT	NT	ND	Bact Cx, CSF	ND	Bact Cx, CSF	NT	NT	ND	NT	NT	Y
MNA_312_322	61	NT	NT	NT	NT	P. agglomerans	Bact Cx, CSF	ND	Bact Cx, CSF	NT	NT	Pantoea spp.	NT	NT	Y
MNA_313_323	62	NT	NT	NT	NT	ND	Bact Cx, CSF	C. neoformans	Bact Cx, CSF	NT	NT	C. neoformans	NT	NT	N
								Pos >1:1280	CrAg, CSF			HIV	HIV 42,529 IU/mL	HIV RNA, CSF	N
MNA_314_324	63	NT	NT	NT	NT	A. baumannii, rare	Bact Cx, CSF	ND	Bact Cx, CSF	NT	NT	ND	NT	NT	Y
MNA_315_325	64	ND	EV RNA, CSF	ND	HSV DNA, CSF	ND	Bact Cx, CSF	ND	Bact Cx, CSF	NT	NT	Neg (multiple bacterial genera)	NT	NT	N
MNA_316_326	65	NT	NT	NT	NT	ND	Bact Cx, CSF	ND	Bact Cx, CSF	NT	NT	ND	NT	NT	N
						ND	AFB Cx, CSF								N
MNA_317_327	66	NT	NT	NT	NT	ND	Bact Cx, CSF	ND	Bact Cx, CSF	NT	NT	Neg (multiple bacterial genera)	NT	NT	N
							Lyme Ab, CSF	ND
MNA_318_328	67	EV Pos	EV RNA, CSF	NT	NT	ND	Bact Cx, CSF	ND	Bact Cx, CSF	NT	NT	Enterovirus B (Echovirus 30)	NT	NT	N
MNA_351_361	68	NT	NT	NT	NT	E. coli	Bact Cx, CSF	ND	Bact Cx, CSF	NT	NT	ND	NT	NT	N
MNA_352_362	69	EV Pos	EV RNA, CSF	NT	NT	ND	NT	NT	NT	NT	NT	Enterovirus B (Echovirus 30)	NT	NT	N
MNA_353_363	70	NT	NT	NT	NT	S. maltophilia, moderate	Bact Cx, CSF	ND	Bact Cx, CSF	NT	NT	S. maltophilia	NT	NT	Y
												HSV1	HSV1 Pos	HSV DNA, CSF	Y
MNA_354_364	71	NT	NT	EBV Pos	EBV DNA, CSF	ND	M. tuberculosis PCR	NT	NT	NT	NT	EBV	NT	NT	N
MNA_356_366	72	NT	NT	ND	VZV DNA, CSF	ND	AFB Cx, CSF	ND	Fungal Cx, CSF	NT	NT	ND	NT	NT	N
								ND	CrAg, CSF						N
MNA_357_367	73	NT	NT	NT	NT	ND	Bact Cx, CSF	ND	Bact Cx, CSF	NT	NT	Neg (multiple bacterial genera)	NT	NT	N
MNA_358_368	74	NT	NT	ND	HSV DNA, CSF	ND	Bact Cx, CSF	ND	Fungal Cx, CSF	NT	NT	ND	NT	NT	N
				ND	VZV DNA, CSF	ND	AFB Cx, CSF	ND	C. immitis Ab, blood						N
						ND	M. tuberculosis PCR								N
MNA_372_382	75	NT	NT	500 cp/mL	VZV DNA, CSF	ND	Bact Cx, CSF	ND	CrAg, CSF	NT	NT	VZV	NT	NT	N
				ND	HSV DNA, CSF	ND	VDRL, CSF								N
MNA_373_383	76	NT	NT	NT	NT	ND	Bact Cx, CSF	C. tropicalis, moderate	Bact Cx, CSF	NT	NT	C. tropicalis	NT	NT	N
								ND	CrAg, CSF						N
MNA_374_384	77	NT	NT	CMV Pos	CMV DNA, CSF	NT	NT	NT	NT	NT	NT	CMV	NT	NT	N
MNA_375_385	78	NT	NT	NT	NT	E. cloacae, rare	Bact Cx, CSF	ND	Bact Cx, CSF	NT	NT	ND	NT	NT	Y
MNA_376_386	79	NT	NT	NT	NT	ND	Bact Cx, CSF	ND	Fungal Cx, CSF	NT	NT	ND	NT	NT	N
						ND	VDRL, CSF	ND	CrAg, CSF						N
MNA_377_387	80	NT	NT	VZV Pos	VZV DNA, CSF	NT	NT	NT	NT	NT	NT	VZV	NT	NT	N
MNA_378_388	81	NT	NT	NT	NT	E. coli, broth only	Bact Cx, CSF	ND	Bact Cx, CSF	NT	NT	ND	NT	NT	Y
MNA_391_401	82	NT	NT	EBV Pos	EBV DNA, CSF	NT	NT	NT	NT	NT	NT	HIV	NT	NT	N
												Rhinovirus B	NT	NT	N
MNA_392_402	83	NT	NT	VZV 7,400 cp/mL	VZV DNA, CSF	ND	Bact Cx, CSF	ND	CrAg, CSF	NT	NT	VZV	NT	NT	N
				ND	HSV DNA, CSF	ND	VDRL, CSF								N
						ND	Lyme Ab, blood								N
MNA_411_421	84	NT	NT	ND	HSV DNA, CSF	ND	Bact Cx, CSF	ND	Bact Cx, CSF	NT	NT	Bacillus spp.	NT	NT	N
				ND	VZV DNA, CSF										N
MNA_412_422	85	EV Pos	EV RNA, CSF	NT	NT	NT	NT	NT	NT	NT	NT	Enterovirus B (Echovirus 30)	NT	NT	N
MNA_413_423	86	NT	NT	VZV Pos	VZV DNA, CSF	NT	NT	NT	NT	NT	NT	VZV	NT	NT	N
												EBV	EBV Pos Ct 31.26	EBV DNA, CSF	N
MNA_414_424	87	EV Pos	EV RNA, CSF	NT	NT	NT	NT	NT	NT	NT	NT	Enterovirus B	NT	NT	Y
												Rotavirus A	NT	NT	Y
MNA_415_425	88	NT	NT	HSV2 Pos	HSV DNA, CSF	ND	M. tuberculosis PCR	NT	NT	NT	NT	ND	NT	NT	N
MNA_416_426	89	NT	NT	CMV Pos	CMV DNA, CSF	NT	NT	NT	NT	NT	NT	CMV	NT	NT	N
MNA_417_427	90	NT	NT	HSV1 Pos	HSV DNA, CSF	NT	NT	NT	NT	NT	NT	HSV1	NT	NT	Y
MNA_418_428	91	ND	WNV IgM Ab, CSF	VZV Pos	VZV DNA, CSF	NT	NT	NT	NT	NT	NT	VZV	NT	NT	N
MNA_431_441	92	NT	NT	JCV Pos	JCV DNA, CSF	NT	NT	NT	NT	NT	NT	JCV	NT	NT	N
												HIV	NT	NT	N
MNA_432_442	93	NT	NT	JCV Pos	JCV DNA, CSF	ND	T. whipplei DNA, CSF	NT	NT	NT	NT	JCV	NT	NT	N
												HIV	HIV Pos <40 IU/mL	HIV RNA, CSF	N
MNA_433_443	94	NT	NT	HSV1 Pos	HSV DNA, CSF	NT	NT	NT	NT	NT	NT	HSV1	NT	NT	N
MNA_434_444	95	NT	NT	HSV2 Pos	HSV DNA, CSF	NT	NT	NT	NT	NT	NT	HSV2	NT	NT	N
Sample Count	95										Overall Analytical Comparison
												Original Clinical Results	Confirmatory Results	Excluding High Host Background
											TP	58	67	50
											FP	1	1	1
											FN	21	16	6
											TN	136	141	117
											Total	216	225	174
											Sensitivity/PPA	0.734177	0.807229	0.892857
											Specificity/NPA	0.992701	0.992958	0.991525
											% Agreement	0.898148	0.924444	0.95977

## Sheet: RNA virus
Clinical Test Data		RNA Virus		mNGS	Confirmatory Test			Comparison To:
Sample ID	#	Result for RNA Virus	Method	Result for RNA Virus	Result for RNA Virus	Method	High Host Background	Clinical Results	Confirmatory Results	Excluding High Host Background
MNA_088_096	1	894,372 IU/mL	HCV RNA, blood	HCV	NT	NT	N	TP	TP	TP
		ND	HIV RNA, blood		NT	NT	N			0
MNA_090_098	3	>1,000,000 cp/mL	HIV RNA, blood	HIV	NT	NT	N	TP	TP	TP
		ND	HCV Ab, blood		NT	NT	N			0
MNA_092_100	5	Pos 1.21	WNV IgM Ab, blood	WNV	NT	NT	N	TP	TP	TP
		ND	WNV IgM Ab, CSF				N			0
		ND	EV RNA, CSF				N			0
MNA_125_135	7	Pos 4.13	WNV IgM Ab, CSF (RR ≤1.10)	ND	NT	NT	N	FN	FN	FN
		Pos 2.98	WNV IgG Ab, blood (RR ≤1.10)				N			0
		ND	EV RNA, CSF				N			0
		ND	HCV RNA, blood				N			0
MNA_194_204	18	EV Pos	EV RNA, CSF	ND	NT	NT	N	FN	FN	FN
MNA_197_207	20	Pos 4.70	WNV IgM Ab, CSF (RR ≤1.10)	ND	ND	WNV RNA, CSF	N	FN	TN	TN
		Pos 2.41	WNV IgG Ab, CSF (RR ≤1.49)				N			0
		ND	EV RNA, CSF				N			0
		ND	HIV RNA, blood				N			0
MNA_212_222	23	NT	NT	HIV	HIV 1,697 IU/mL	HIV RNA, CSF	N	Untested	TP	TP
MNA_216_226	6	NT	NT	HIV	NT	NT	N	Untested	Untested	Untested
MNA_218_228	8	Pos 2.69	WNV IgG Ab, CSF (RR ≤1.49)	ND	ND	WNV RNA, CSF	N	FN	TN	TN
		Pos 6.39	WNV IgM Ab, blood (RR ≤1.10)				N			0
		Pos 13.7	JEV IgM Ab, blood (RR ≤6.0)				N			0
		ND	JEV IgG Ab, blood				N			0
		ND	EV RNA, CSF				N			0
MNA_231_241	29	NT	NT	HIV	HIV 73 IU/mL	HIV RNA, CSF	N	Untested	TP	TP
MNA_237_247	34	ND	WNV IgM Ab, CSF	ND	NT	NT	N	TN	TN	TN
		ND	WNV IgG Ab, CSF				N			0
MNA_253_263	38	>1,000,000 cp/mL	HIV RNA, blood	HIV	HIV 35,792 IU/mL	HIV RNA, CSF	N	TP	TP	TP
MNA_291_301	52	ND	EV RNA, CSF	ND	NT	NT	N	TN	TN	TN
MNA_293_303	4	ND	EV RNA, CSF	ND	NT	NT	N	TN	TN	TN
MNA_313_323	62	NT	NT	HIV	HIV 42,529 IU/mL	HIV RNA, CSF	N	Untested	TP	TP
MNC_315_325	64	ND	EV RNA, CSF	Neg (multiple bacterial genera)	NT	NT	N	TN	TN	TN
MNA_318_328	67	EV Pos	EV RNA, CSF	Enterovirus B (Echovirus 30)	NT	NT	N	TP	TP	TP
MNA_352_362	69	EV Pos	EV RNA, CSF	Enterovirus B (Echovirus 30)	NT	NT	N	TP	TP	TP
MNA_391_401	82	NT	NT	HIV	NT	NT	N	Untested	Untested	Untested
				Rhinovirus B	NT	NT	N	Untested	Untested	Untested
MNA_412_422	85	EV Pos	EV RNA, CSF	Enterovirus B (Echovirus 30)	NT	NT	N	TP	TP	TP
MNA_414_424	87	EV Pos	EV RNA, CSF	Enterovirus B	NT	NT	Y	TP	TP	Excluded
				Rotavirus A	NT	NT	Y	Untested	Untested	Excluded
MNC_418_428	91	ND	WNV IgM Ab, CSF	ND	NT	NT	N	TN	TN	TN
MNA_431_441	92	NT	NT	HIV	NT	NT	N	Untested	Untested	Untested
MNA_432_442	93	NT	NT	HIV	HIV Pos <40 IU/mL	HIV RNA, CSF	N	Untested	TP	TP
Sample Count	24						TP	8	12	11
							FP	0	0	0
							FN	4	2	2
							TN	5	7	7
							Sensitivity	0.666667	0.857143	0.846154
							Specificity	1	1	1
							% Agreement	0.764706	0.904762	0.9

## Sheet: DNA Virus
Clinical Test Data		DNA Virus		mNGS	Confirmatory Test			Comparison To:
Sample ID	#	Result for DNA Virus	Method	Result for DNA Virus	Result for DNA Virus	Method	High Host Background	Clinical Results	Confirmatory Results	Excluding High Host Background
MNA_089_097	2	14,200 cp/mL	VZV DNA, CSF	VZV	NT	NT	N	TP	TP	TP
		ND	HCV DNA, CSF				N			0
		ND	CMV DNA, CSF				N			0
MNA_092_100	5	ND	HSV DNA, CSF	ND	NT	NT	N	TN	TN	TN
		ND	VZV DNA, CSF				N			0
		ND	EBV DNA, CSF				N			0
		ND	HHV6 DNA, CSF				N			0
		ND	CMV DNA, blood				N			0
MNA_093_101	6	HSV1 Pos	HSV DNA, CSF	HSV1	NT	NT	N	TP	TP	TP
		HHV6 Pos	HHV6 DNA, CSF	HHV6	NT	NT	N	TP	TP	TP
				CMV	CMV 137 IU/mL	CMV DNA, CSF	N	Untested	TP	TP
MNA_125_135	7	ND	HSV DNA, CSF	ND	NT	NT	N	TN	TN	TN
		ND	VZV DNA, CSF				N			0
		ND	EBV DNA, CSF				N			0
		ND	CMV DNA, CSF				N			0
MNA_128_138	10	ND	EBV DNA, blood	ND	NT	NT	Y	TN	TN	Excluded
		ND	Adenovirus DNA, blood				Y			Excluded
		ND	CMV DNA, blood				Y			Excluded
		HHV6 231 cp/mL	HHV6 DNA, blood				Y			Excluded
		BKV 2,840 cp/mL	BKV DNA, blood				Y			Excluded
MNA_129_139	11	500 cp/mL	VZV DNA, CSF	VZV	NT	NT	N	TP	TP	TP
		ND	VZV IgM Ab, CSF				N			0
MNA_130_140	12	ND	HSV DNA, CSF	ND	NT	NT	N	TN	TN	TN
MNA_160_170	14	ND	HSV DNA, CSF	ND	NT	NT	N	TN	TN	TN
		ND	HHV6 DNA, blood				N			0
		ND	HHV7 DNA, blood				N			0
		ND	HHV8 DNA, blood				N			0
MNA_161_171	15	17,700 IU/mL	EBV DNA, CSF	EBV	NT	NT	N	TP	TP	TP
		ND	EBV DNA, blood				N			0
		ND	HSV DNA, CSF				N			0
		ND	CMV DNA, CSF				N			0
		ND	CMV DNA, blood				N			0
		ND	HHV6 DNA, CSF				N			0
		ND	JCV DNA, CSF				N			0
		ND	VZV IgM Ab, CSF				N			0
		ND	VZV IgG Ab, CSF				N			0
MNA_197_207	20	ND	HSV DNA, CSF	ND	NT	NT	N	TN	TN	TN
		ND	EBV IgM Ab, CSF				N
		ND	VZV DNA, CSF				N
		ND	EBV DNA, CSF				N
MNA_211_221	22	ND	HSV DNA, CSF	ND	NT	NT	N	TN	TN	TN
MNA_212_222	23	ND	HSV DNA, CSF	ND	NT	NT	N	TN	TN	TN
MNA_215_225	25	600 cp/mL	VZV DNA, CSF	VZV	NT	NT	N	TP	TP	TP
MNA_218_228	28	ND	HSV DNA, CSF	ND	NT	NT	N	TN	TN	TN
		ND	VZV DNA, CSF				N			0
		ND	EBV DNA, CSF				N			0
		ND	VZV IgM Ab, CSF				N			0
		ND	VZV IgG Ab, CSF				N			0
MNA_231_241	29	ND	CMV DNA, CSF	ND	NT	NT	N	TN	TN	TN
		ND	JCV DNA, CSF				N			0
		ND	EBV DNA, CSF				N			0
MNA_236_246	33	ND	HSV DNA, CSF	ND	NT	NT	N	TN	TN	TN
MNA_237_247	34	1,600,000 IU/mL	CMV DNA, CSF	CMV	NT	NT	N	TP	TP	TP
		ND	EBV DNA, CSF	Parvovirus	NT	NT	N	Untested	Untested	Untested
		ND	HHV6 DNA, CSF				N			0
		ND	VZV DNA, CSF				N			0
		ND	HSV DNA, CSF				N			0
MNA_238_248	35	NT	NT	HHV6	HHV6 717,000 cp/mL	HHV6 DNA, CSF	Y	Untested	TP	Excluded
MNA_252_262	37	7,800 cp/mL	VZV DNA, CSF	VZV	NT	NT	N	TP	TP	TP
MNA_253_263	38	ND	HHV8 DNA, blood	ND	NT	NT	N	TN	TN	TN
MNA_256_266	40	ND	VZV IgM Ab, CSF	ND	NT	NT	N	TN	TN	TN
MNA_271_281	44	Pos <251 cp/mL	VZV DNA, CSF	ND	NT	NT	Y	FN	FN	Excluded
		ND	HSV DNA, CSF				Y			Excluded
MNA_272_282	45	15,700 cp/mL	VZV DNA, CSF	VZV			N	TP	TP	TP
				EBV	Pos Ct 35.16	EBV DNA, CSF	N	Untested	TP	TP
MNA_274_284	7	160,000 cp/mL	CMV DNA, CSF	CMV	NT	NT	N	TP	TP	TP
				Parvovirus	NT	NT	N	Untested	Untested	Untested
MNA_291_301	52	ND	HSV DNA, CSF	ND	NT	NT	N	TN	TN	TN
MNC_293_303	54	ND	HSV DNA, CSF	ND	NT	NT	N	TN	TN	TN
MNA_295_305	56	NT	NT	HHV7	NT	NT	N	Untested	Untested	Untested
MNA_296_306	57	1,400 cp/mL	VZV DNA, CSF	ND	NT	NT	Y	FN	FN	Excluded
		Pos 4.1	VZV IgM Ab, CSF				Y			Excluded
		Pos >4,000	VZV IgG Ab, CSF				Y			Excluded
		ND	HSV DNA, CSF				Y			Excluded
MNC_315_325	64	ND	HSV DNA, CSF	Neg (multiple bacterial genera)	NT	NT	N	TN	TN	TN
MNA_353_363	70	NT	NT	HSV1	HSV1 Pos	HSV DNA, CSF	Y	Untested	TP	Excluded
MNA_354_364	71	EBV Pos	EBV DNA, CSF	EBV	NT	NT	N	TP	TP	TP
MNA_356_366	72	ND	VZV DNA, CSF	ND	NT	NT	N	TN	TN	TN
MNA_358_368	74	ND	HSV DNA, CSF	ND	NT	NT	N	TN	TN	TN
		ND	VZV DNA, CSF				N			0
MNA_372_382	75	500 cp/mL	VZV DNA, CSF	VZV	NT	NT	N	TP	TP	TP
		ND	HSV DNA, CSF				N			0
MNA_374_384	77	CMV Pos	CMV DNA, CSF	CMV	NT	NT	N	TP	TP	TP
MNA_377_387	80	VZV Pos	VZV DNA, CSF	VZV	NT	NT	N	TP	TP	TP
MNA_391_401	82	EBV Pos	EBV DNA, CSF	ND	NT	NT	N	FN	FN	FN
MNA_392_402	83	VZV 7,400 cp/mL	VZV DNA, CSF	VZV	NT	NT	N	TP	TP	TP
		ND	HSV DNA, CSF				N			0
MNA_411_421	84	ND	HSV DNA, CSF	ND	NT	NT	N	TN	TN	TN
		ND	VZV DNA, CSF				N			0
MNA_413_423	86	VZV Pos	VZV DNA, CSF	VZV	NT	NT	N	TP	TP	TP
				EBV	EBV Pos Ct 31.26	EBV DNA, CSF	N	Untested	TP	TP
MNA_415_425	88	HSV2 Pos	HSV DNA, CSF	ND	NT	NT	N	FN	FN	FN
MNA_416_426	89	CMV Pos	CMV DNA, CSF	CMV	NT	NT	N	TP	TP	TP
MNA_417_427	90	HSV1 Pos	HSV DNA, CSF	HSV1	NT	NT	Y	TP	TP	Excluded
MNA_418_428	91	VZV Pos	VZV DNA, CSF	VZV	NT	NT	N	TP	TP	TP
MNA_431_441	92	JCV Pos	JCV DNA, CSF	JCV	NT	NT	N	TP	TP	TP
MNA_432_442	93	JCV Pos	JCV DNA, CSF	JCV	NT	NT	N	TP	TP	TP
MNA_433_443	94	HSV1 Pos	HSV DNA, CSF	HSV1	NT	NT	N	TP	TP	TP
MNA_434_444	95	HSV2 Pos	HSV DNA, CSF	HSV2	NT	NT	N	TP	TP	TP
Sample Count	48
							TP	23	28	25
							FP	0	0	0
							FN	4	4	2
							TN	19	19	18
							Sensitivity	0.851852	0.875	0.925926
							Specificity	1	1	1
							% Agreement	0.913043	0.921569	0.955556

## Sheet: Bacteria
Clinical Test Data		Bacteria		mNGS	Confirmatory Test			Comparison To:
Sample ID	#	Result for Bacteria	Method	Result for Bacteria	Result for Bacteria	Method	High Host Background	Clinical Results	Confirmatory Results	Excluding High Host Background
MNA_088_096	1	S. aureus, few	Bact Cx, CSF	ND	NT	NT	Y	FN	FN	Excluded
		ND	Lyme Ab, blood				Y			Excluded
		ND	RPR, blood				Y			Excluded
MNA_089_097	2	ND	Bact Cx, CSF	ND	NT	NT	N	TN	TN	TN
		ND	RPR, blood				N			0
							N			0
MNA_090_098	3	ND	Bact Cx, CSF	ND	NT	NT	N	TN	TN	TN
		ND	VDRL, CSF				N			0
		ND	RPR, blood				N			0
MNA_091_099	4	E. faecium, rare	Bact Cx, CSF	E. faecium	NT	NT	Y	TP	TP	Excluded
MNA_092_100	5	ND	Bact Cx, CSF	ND	NT	NT	N	TN	TN	TN
		ND	VDRL, CSF				N			0
							N			0
							N			0
							N			0
MNA_093_101	6	ND	Bact Cx, CSF	ND	NT	NT	N	TN	TN	TN
MNA_125_135	7	ND	Bact Cx, CSF	ND	NT	NT	N	TN	TN	TN
		ND	Lyme Ab, CSF				N			0
MNA_126_136	8	ND	Bact Cx, CSF	ND	NT	NT	N	TN	TN	TN
MNA_127_137	9	K. pneumoniae, numerous	Bact Cx, CSF	K. pneumoniae	NT	NT	Y	TP	TP	Excluded
MNA_128_138	10	ND	Bact Cx, CSF	ND	NT	NT	Y	TN	TN	Excluded
		ND	VDRL, CSF				Y			Excluded
MNA_130_140	12	S. pneumoniae, rare	Bact Cx, CSF	S. pneumoniae	NT	NT	Y	TP	TP	Excluded
		ND	VDRL, CSF				Y			Excluded
MNA_158_168	13	S. pneumoniae	Bact Cx, CSF	S. pneumoniae	NT	NT	N	TP	TP	TP
MNA_160_170	14	E. gallinarum, broth only	Bact Cx, CSF	ND	E. gallinarum	Bact 16S PCR, CSF	Y	FN	FN	Excluded
		ND	AFB Cx, CSF				Y			Excluded
		ND	RPR, blood				Y			Excluded
MNA_161_171	15	ND	Bact Cx, CSF	ND	NT	NT	N	TN	TN	TN
MNA_191_201	16	ND	Bact Cx, CSF	ND	NT	NT	N	TN	TN	TN
MNA_192_202	17	P. mirabilis, rare	Bact Cx, CSF	ND	ND	Bact 16S PCR, CSF	N	FN	TN	TN
MNA_195_205	19	ND	Bact Cx, CSF	Neg (multiple genera)b	NT	NT	N	TN	TN	TN
MNA_197_207	20	ND	Bact Cx, CSF	ND	NT	NT	N	TN	TN	TN
		ND	AFB Cx, CSF				N			0
MNA_198_208	21	S. marcescens, numerous	Bact Cx, CSF	S. marcescens	NT	NT	Y	TP	TP	Excluded
MNA_211_221	22	ND	Bact Cx, CSF	ND	NT	NT	N	TN	TN	TN
		ND	AFB Cx, CSF				N			0
		ND	VDRL, CSF				N			0
MNA_212_222	23	ND	Bact Cx, CSF	ND	NT	NT	N	TN	TN	TN
		ND	VDRL, CSF				N			0
MNA_213_223	24	S. aureus, moderate	Bact Cx, CSF	S. aureus	NT	NT	Y	TP	TP	Excluded
MNA_215_225	25	ND	Bact Cx, CSF	ND	NT	NT	N	TN	TN	TN
		ND	VDRL, CSF				N			0
MNA_216_226	26	ND	Bact Cx, CSF	ND	NT	NT	N	TN	TN	TN
MNA_217_227	27	P. aeruginosa, rare	Bact Cx, CSF	P. aeruginosa	NT	NT	N	TP	TP	TP
MNA_218_228	28	ND	Lyme Ab, CSF	ND	NT	NT	N	TN	TN	TN
MNA_231_241	29	ND	Bact Cx, CSF	ND	NT	NT	N	TN	TN	TN
		ND	AFB Cx, CSF				N			0
MNA_232_242	30	ND	Bact Cx, CSF	Neg (multiple genera)c	NT	NT	N	TN	TN	TN
MNA_233_243	31	ND	Bact Cx, CSF	Neg (multiple genera)d	NT	NT	N	TN	TN	TN
MNA_235_245	32	K. oxytoca, moderate	Bact Cx, CSF	K. oxytoca	NT	NT	Y	TP	TP	Excluded
MNA_236_246	33	ND	Bact Cx, CSF	ND	NT	NT	N	TN	TN	TN
		ND	VDRL, CSF				N			0
MNA_237_247	34	ND	Bact Cx, CSF	ND	NT	NT	N	TN	TN	TN
		ND	AFB Cx, CSF				N			0
MNA_238_248	35	S. aureus, rare	Bact Cx, CSF	ND	NT	NT	Y	FN	FN	Excluded
MNA_251_261	36	ND	Bact Cx, CSF	Neg (multiple genera)e			N	TN	TN	TN
MNA_252_262	37	ND	Bact Cx, CSF	ND	NT	NT	N	TN	TN	TN
MNA_253_263	38	ND	Bact Cx, CSF	ND	NT	NT	N	TN	TN	TN
MNA_254_264	39	P. aeruginosa, few	Bact Cx, CSF	P. aeruginosa	NT	NT	N	TP	TP	TP
MNA_255_265	40	E. faecalis	Bact Cx, CSF	E. faecalis	NT	NT	Y	TP	TP	Excluded
MNA_256_266	41	ND	VDRL, CSF	ND	NT	NT	N	TN	TN	TN
MNA_257_267	42	ND	Bact Cx, CSF	ND	NT	NT	N	TN	TN	TN
MNA_258_268	43	E. coli, few	Bact Cx, CSF	ND	NT	NT	Y	FN	FN	Excluded
MNA_271_281	44	ND	Bact Cx, CSF	ND	NT	NT	N	TN	TN	TN
		ND	AFB Cx, CSF				N			0
		ND	VDRL, CSF				N			0
MNA_273_283	46	S. aureus, numerous	Bact Cx, CSF	S. aureus	NT	NT	Y	TP	TP	Excluded
MNA_274_284	47	ND	Bact Cx, CSF	ND	NT	NT	N	TN	TN	TN
MNA_275_285	48	ND	Bact Cx, CSF	ND	NT	NT	N	TN	TN	TN
		ND	AFB Cx, CSF				N			0
MNA_276_286	49	P. aeruginosa, rare	Bact Cx, CSF	P. aeruginosa	NT	NT	N	TP	TP	TP
MNA_277_287	50	ND	Bact Cx, CSF	ND	NT	NT	N	TN	TN	TN
		ND	Lyme Ab, CSF				N			0
MNA_278_288	51	ND	Bact Cx, CSF	ND	NT	NT	N	TN	TN	TN
MNA_291_301	52	ND	Bact Cx, CSF	ND	NT	NT	N	TN	TN	TN
MNA_292_302	53	ND	Bact Cx, CSF	ND	NT	NT	N	TN	TN	TN
MNA_293_303	54	ND	Bact Cx, CSF	ND	NT	NT	N	TN	TN	TN
MNA_294_304	55	K. pneumoniae, rare	Bact Cx, CSF	K. pneumoniae	NT	NT	Y	TP	TP	Excluded
MNA_295_305	56	ND	Bact Cx, CSF	ND	NT	NT	N	TN	TN	TN
MNA_296_306	57	ND	Bact Cx, CSF	ND	NT	NT	N	TN	TN	TN
MNA_297_307	58	S. epidermidis, moderate	Bact Cx, CSF	S. epidermidis	NT	NT	Y	TP	TP	Excluded
MNA_298_308	59	ND	Bact Cx, CSF	ND	NT	NT	N	TN	TN	TN
MNA_311_321	60	ND	Bact Cx, CSF	ND	NT	NT	Y	TN	TN	Excluded
MNA_312_322	61	P. agglomerans	Bact Cx, CSF	Pantoea spp.	NT	NT	Y	TP	TP	Excluded
MNA_313_323	62	ND	Bact Cx, CSF	ND	NT	NT	N	TN	TN	TN
MNA_314_324	63	A. baumannii, rare	Bact Cx, CSF	ND	NT	NT	Y	FN	FN	Excluded
MNA_315_325	64	ND	Bact Cx, CSF	Neg (multiple genera)f	NT	NT	N	TN	TN	TN
MNA_316_326	65	ND	Bact Cx, CSF	ND	NT	NT	N	TN	TN	TN
		ND	AFB Cx, CSF				N			0
MNA_317_327	66	ND	Bact Cx, CSF	Neg (multiple genera)g	NT	NT	N	TN	TN	TN
		ND	Lyme Ab, CSF				N			0
MNA_318_328	67	ND	Bact Cx, CSF	ND	NT	NT	N	TN	TN	TN
MNA_351_361	68	E. coli	Bact Cx, CSF	ND	NT	NT	N	FN	FN	FN
MNA_353_363	70	S. maltophilia, moderate	Bact Cx, CSF	S. maltophilia	NT	NT	Y	TP	TP	Excluded
MNA_354_364	71	ND	M. tuberculosis PCR	ND	NT	NT	N	TN	TN	TN
MNA_356_366	72	ND	AFB Cx, CSF	ND	NT	NT	N	TN	TN	TN
MNA_357_367	73	ND	Bact Cx, CSF	Neg (multiple genera)h	NT	NT	N	TN	TN	TN
MNA_358_368	74	ND	Bact Cx, CSF	ND	NT	NT	N	TN	TN	TN
		ND	AFB Cx, CSF				N			0
		ND	M. tuberculosis PCR				N			0
MNA_372_382	75	ND	Bact Cx, CSF	ND	NT	NT	N	TN	TN	TN
		ND	VDRL, CSF				N			0
MNA_373_383	76	ND	Bact Cx, CSF	ND	NT	NT	N	TN	TN	TN
							N			0
MNA_375_385	78	E. cloacae, rare	Bact Cx, CSF	ND	NT	NT	Y	FN	FN	Excluded
MNA_376_386	79	ND	Bact Cx, CSF	ND	NT	NT	N	TN	TN	TN
		ND	VDRL, CSF				N			0
MNA_378_388	81	E. coli, broth only	Bact Cx, CSF	ND	NT	NT	Y	FN	FN	Excluded
MNA_392_402	83	ND	Bact Cx, CSF	ND	NT	NT	N	TN	TN	TN
		ND	VDRL, CSF				N			0
		ND	Lyme Ab, blood				N			0
MNA_411_421	84	ND	Bact Cx, CSF	Bacillus spp.i	NT	NT	N	FP	FP	FP
MNC_415_425	88	ND	M. tuberculosis PCR	ND	NT	NT	N	TN	TN	TN
MNC_432_442	93	ND	T. whipplei DNA, CSF	ND	NT	NT	N	TN	TN	TN
Sample Count	79						TP	16	16	4
							FP	1	1	1
							FN	9	8	1
							TN	53	54	52
							Sensitivity	0.64	0.666667	0.8
							Specificity	0.981481	0.981818	0.981132
							% Agreement	0.873418	0.886076	0.965517
Bacterial species detected in samples with multiple bacteria identified by mNGS:
a Bifidobacterium longum, Propionibacterium propionicum, Lactobacillus sanfranciscensis, Faecalibacterium prausnitzii, Corynebacterium falsenii, Staphylococcus pasteuri, Staphylococcus chromogenes
b Clostridiales genomosp. BVAB3, Agrobacterium sp. H13-3, Streptococcus thermophilus, Klebsiella pneumoniae, Lactobacillus plantarum, Pantoea sp. PSNIH1, Lactobacillus fermentum
c Rhizobium spp., Pseudomononas pseudoalcaligenes
d Bacillus megaterium, Bifidobacterium longum
e Modestobacter marinus, Methylobacterium oryzae
f Streptococcus salivarius, Streptococcus parasanguinis, Streptococcus mitis, Veillonella parvula
g Streptococcus parasanguinis, Pseudomonas mosselii, Streptococcus salivarus
h Pluralibacter gergoviae, Desulfotomaculum carboxydivorans, Bacillus cereus, Rhodococcus erythropolis
i Bacillus cereus, Bacillus thuringiensis

## Sheet: Fungi
Clinical Test Data		Fungi		mNGS	Confirmatory Test			Comparison To:
Sample ID	#	Result for Fungi	Method	Result for Fungi	Result for Fungi	Method	High Host Background	Clinical Results	Confirmatory Results	Excluding High Host Background
MNA_089_097	2	ND	Bact Cx, CSF	ND	NT	NT	N	TN	TN	TN
MNA_090_098	3	C. neoformans	Bact Cx, CSF	C. neoformans	NT	NT	N	TP	TP	TP
		Pos >1:1280	CrAg, CSF				N			0
		Pos >500	Beta-D-glucan, blood (RR ≤80 pg/mL)				N			0
MNA_091_099	4	ND	Bact Cx, CSF	ND	NT	NT	Y	TN	TN	Excluded
MNA_092_100	5	ND	Fungal Cx, CSF	ND	NT	NT	N	TN	TN	TN
		ND	CrAg, CSF				N			0
		ND	C. immitis Ab by CF, blood				N			0
MNA_093_101	6	C. albicans	Fungal Cx, CSF	C. albicans	NT	NT	N	TP	TP	TP
MNA_125_135	7	ND	Bact Cx, CSF	ND	NT	NT	N	TN	TN	TN
MNA_126_136	8	ND	Bact Cx, CSF	ND	NT	NT	N	TN	TN	TN
MNA_127_137	9	ND	Bact Cx, CSF	ND	NT	NT	Y	TN	TN	Excluded
MNA_128_138	10	C. krusei	Bact Cx, CSF	C. krusei	NT	NT	Y	TP	TP	Excluded
		Pos 319 (positive >80 pg/mL)	Beta-D-glucan, blood				Y			Excluded
MNA_130_140	12	ND	CrAg, CSF	ND	NT	NT	Y	TN	TN	Excluded
MNA_158_168	13	ND	Bact Cx, CSF	ND	NT	NT	N	TN	TN	TN
MNA_160_170	14	ND	CrAg, CSF	ND	NT	NT	Y	TN	TN	Excluded
		ND	Fungal Cx, CSF				Y			Excluded
		ND	C. immitis Ab by CF, CSF				Y			Excluded
MNA_161_171	15	ND	CrAg, CSF	ND	NT	NT	N	TN	TN	TN
MNA_191_201	16	C. parapsilosis, rare	Bact Cx, CSF	ND	ND	Fungal ITS PCR, CSF	N	FN	TN	TN
MNA_192_202	17	ND	Bact Cx, CSF	ND	NT	NT	Y	TN	TN	Excluded
MNA_195_205	19	ND	Bact Cx, CSF	ND	NT	NT	N	TN	TN	TN
MNA_197_207	20	ND	Fungal Cx, CSF	ND	NT	NT	N	TN	TN	TN
		ND	C. immitis Ab by ID and CF, blood				N			0
		ND	CrAg, CSF				N			0
MNA_198_208	21	ND	Bact Cx, CSF	ND	NT	NT	Y	TN	TN	Excluded
MNA_211_221	22	Pos 1:160	CrAg, CSF	ND	ND	C. neoformans PCR	N	FN	TN	TN
		ND	Fungal Cx, CSF				N			0
MNA_212_222	23	Pos 1:320	CrAg, CSF	C. neoformans	NT	NT	N	TP	TP	TP
		ND	Bact Cx, CSF				N			0
MNA_213_223	24	ND	Bact Cx, CSF	ND	NT	NT	Y	TN	TN	Excluded
MNA_215_225	25	ND	Bact Cx, CSF	ND	NT	NT	N	TN	TN	TN
MNA_216_226	26	C. neoformans, rare	Bact Cx, CSF	C. neoformans	NT	NT	N	TP	TP	TP
		Pos 1:160	CrAg, CSF				N			0
MNA_217_227	27	ND	Bact Cx, CSF	ND	NT	NT	N	TN	TN	TN
MNA_218_228	28	ND	CrAg, CSF	ND	NT	NT	N	TN	TN	TN
		ND	C. immitis Ab by ID, CSF				N	TN	TN	TN
MNA_231_241	29	ND	CrAg, CSF	ND	NT	NT	N	TN	TN	TN
		ND	Bact Cx, CSF				N			0
MNA_235_245	32	ND	Bact Cx, CSF	ND	NT	NT	Y	TN	TN	Excluded
MNA_236_246	33	C. neoformans	Bact Cx, CSF	C. neoformans	NT	NT	N	TP	TP	TP
		Pos >1:1280	CrAg, CSF				N			0
MNA_237_247	34	ND	Fungal Cx, CSF	ND	NT	NT	N	TN	TN	TN
		ND	CrAg, CSF				N			0
		ND	C. immitis Ab, CSF				N			0
		ND	Galactomannan Ag, CSF				N			0
		ND	H. capsulatum Ag, blood				N			0
MNA_238_248	35	ND	Bact Cx, CSF	ND	NT	NT	Y	TN	TN	Excluded
MNA_251_261	36	ND	Bact Cx, CSF	ND			N	TN	TN	TN
MNA_252_262	37	ND	CrAg, CSF	ND	NT	NT	N	TN	TN	TN
		ND	Bact Cx, CSF							0
MNA_253_263	38	C. neoformans, moderate	Bact Cx, CSF	C. neoformans	NT	NT	N	TP	TP	TP
		Pos >1:1024	CrAg, CSF				N			0
MNA_254_264	39	ND	Bact Cx, CSF	ND	NT	NT	N	TN	TN	TN
MNA_255_265	40	ND	Bact Cx, CSF	ND	NT	NT	Y	TN	TN	Excluded
MNA_256_266	41	ND	Fungal Cx, CSF	ND	NT	NT	N	TN	TN	TN
MNA_257_267	42	ND	Bact Cx, CSF	ND	NT	NT	N	TN	TN	TN
MNA_258_268	43	ND	Bact Cx, CSF	ND	NT	NT	Y	TN	TN	Excluded
MNA_271_281	44	Pos >7.6 (Pos if >0.5)	Galactomannan Ag, CSF	ND	A. fumigatus	Fungal ITS PCR, CSF	Y	FN	FN	Excluded
		ND	Fungal Cx, CSF				Y			Excluded
MNA_273_283	46	ND	Bact Cx, CSF	ND	NT	NT	Y	TN	TN	Excluded
MNA_274_284	47	ND	Bact Cx, CSF	ND	NT	NT	N	TN	TN	TN
MNA_275_285	48	S. schenckii	Fungal Cx, CSF	ND	S. schenckii	Fungal ITS PCR, CSF	N	FN	FN	FN
		ND	Sporothrix Ab, CSF				N			0
MNA_276_286	49	ND	Bact Cx, CSF	ND	NT	NT	N	TN	TN	TN
MNA_294_304	55	ND	Bact Cx, CSF	ND	NT	NT	Y	TN	TN	Excluded
MNA_295_305	56	C. immitis	Fungal Cx, CSF	C. immitis	NT	NT	N	TP	TP	TP
		Pos 1:4	C. immitis Ab, peritoneal fluid				N			0
MNA_296_306	57	ND	Bact Cx, CSF	ND	NT	NT	Y	TN	TN	Excluded
MNA_297_307	58	ND	Bact Cx, CSF	ND	NT	NT	Y	TN	TN	Excluded
MNA_298_308	59	ND	Bact Cx, CSF	ND	NT	NT	N	TN	TN	TN
		ND	CrAg, CSF							0
MNA_311_321	60	ND	Bact Cx, CSF	ND	NT	NT	Y	TN	TN	Excluded
MNA_312_322	61	ND	Bact Cx, CSF	ND	NT	NT	Y	TN	TN	Excluded
MNA_313_323	62	C. neoformans	Bact Cx, CSF	C. neoformans	NT	NT	N	TP	TP	TP
		Pos >1:1280	CrAg, CSF				N			0
MNA_314_324	63	ND	Bact Cx, CSF	ND	NT	NT	Y	TN	TN	Excluded
MNA_315_325	64	ND	Bact Cx, CSF	ND	NT	NT	N	TN	TN	TN
MNA_316_326	65	ND	Bact Cx, CSF	ND	NT	NT	N	TN	TN	TN
MNA_317_327	66	ND	Bact Cx, CSF	ND	NT	NT	N	TN	TN	TN
MNA_318_328	67	ND	Bact Cx, CSF	ND	NT	NT	N	TN	TN	TN
MNA_351_361	68	ND	Bact Cx, CSF	ND	NT	NT	N	TN	TN	TN
MNA_353_363	70	ND	Bact Cx, CSF	ND	NT	NT	Y	TN	TN	Excluded
MNA_356_366	72	ND	Fungal Cx, CSF	ND	NT	NT	N	TN	TN	TN
		ND	CrAg, CSF				N			0
MNA_357_367	73	ND	Bact Cx, CSF	ND	NT	NT	N	TN	TN	TN
MNA_358_368	74	ND	Fungal Cx, CSF	ND	NT	NT	N	TN	TN	TN
		ND	C. immitis Ab, blood				N			0
MNA_372_382	75	ND	CrAg, CSF	ND	NT	NT	N	TN	TN	TN
MNA_373_383	76	C. tropicalis, moderate	Bact Cx, CSF	C. tropicalis	NT	NT	N	TP	TP	TP
		ND	CrAg, CSF				N			0
MNA_375_385	78	ND	Bact Cx, CSF	ND	NT	NT	Y	TN	TN	Excluded
MNA_376_386	79	ND	Fungal Cx, CSF	ND	NT	NT	N	TN	TN	TN
		ND	CrAg, CSF				N			0
MNA_378_388	81	ND	Bact Cx, CSF	ND	NT	NT	Y	TN	TN	Excluded
MNA_392_402	83	ND	CrAg, CSF	ND	NT	NT	N	TN	TN	TN
MNA_411_421	84	ND	Bact Cx, CSF	ND	NT	NT	N	TN	TN	TN
Sample Count	68
							TP	10	10	9
							FP	0	0	0
							FN	4	2	1
							TN	55	57	36
							Sensitivity	0.714286	0.833333	0.9
							Specificity	1	1	1
							% Agreement	0.942029	0.971014	0.978261

## Sheet: Parasite
Clinical Test Data		Parasite		mNGS	Confirmatory Test			Comparison To:
Sample ID	#	Result for Parasite	Method	Result for Parasite	Result for Parasite	Method	High Host Background	Clinical Results	Confirmatory Results	Excluding High Host Background
MNA_090_098	3	ND	T. gondii Ab, blood	ND	NT	NT	N	TN	TN	TN
MNA_161_171	15	ND	T. gondii Ab, CSF	ND	NT	NT	N	TN	TN	TN
MNA_231_241	29	ND	T. gondii IgG Ab, CSF	ND	NT	NT	N	TN	TN	TN
MNA_237_247	34	ND	T. gondii Ab, blood	ND	NT	NT	N	TN	TN	TN
MNA_298_308	59	Pos 30.89	T. solium Ab, CSF IgG (RR ≤0.50)	T. solium	Positive	T. solium PCR	N	TP	TP	TP
		Pos 3.55	T. solium Ab, serum IgG (RR ≤0.50)
Sample Count	5						TP	1	1	1
							FP	0	0	0
							FN	0	0	0
							TN	4	4	4
							Sensitivity	1	1	1
							Specificity	1	1	1
							% Agreement	1	1	1
								1	1	1
								0	0	0
								0	0	0
								4	4	4
								1	1	1
								1	1	1
								1	1	1
								1	1	1
								0	0	0
								0	0	0
								4	4	4
								1	1	1
								1	1	1
								1	1	1
