# Supplementary material for: Laboratory validation of a clinical metagenomic sequencing assay for pathogen detection in cerebrospinal fluid
Source: HighWire-hosted journal article supplement (doi:10.1101/gr.238170.118), 2019-04-16
Supplement: Supplemental_Table_S3.xlsx [file Supplemental_Table_S3.xlsx]

## Sheet: Supplemental Table S3 Legend
Supplemental Table S3. Challenge study showing mNGS results from 20 CSF samples with known clinical diagnoses. mNGS results were obtained from 9 successive clinical mNGS runs.

## Sheet: Supplemental Table S3
	RNA Virus		DNA Virus		Bacteria		Fungi		Parasite		mNGS	Comparison To Clinical Test Results
AMES ID	Result	Method	Result	Method	Result	Method	Result	Method	Result	Method	Result	TP	FP	FN	TN
2	NEG	EV CSF PCR	NEG	HSV CSF PCR	NEG	Culture					NEG	0	0	0	3
2	POS	Lyme Serology (serum IgM bands p41, p39, p23)
5	NEG	EV CSF PCR	NEG	HSV CSF PCR	NEG	Culture					WNV	1	0	0	1
5	POS	WNV IgM (CSF and serum microsphere immunoassay confirmed by serum dilution-plaque reduction neutralization testing at CDC)	NEG	CMV CSF PCR	NEG	Lyme Serologies					EBV
5			NEG	HHV-6 CSF PCR	NEG	Rickettsia Serologies
5			NEG	EBV IgM	NEG	Bartonella Serologies
5			POS	EBV IgG	NEG	Mycoplasma PCR and Serologies
5					NEG	Leptospira Serologies
23	NEG	EV CSF PCR	NEG	HSV CSF PCR	NEG	Culture	NEG	Fungal Culture			HIV	1	0	0	3
23	POS	HIV RNA PCR (blood 43000 copies and CSF 400000 copies)	NEG	EBV CSF PCR
23			NEG	VZV CSF PCR
50	POS	EV CSF PCR			NEG	Culture					Enterovirus B	1	1	0	1
50											Corynebacterium spp.
53	POS	EV CSF PCR	NEG	HSV CSF PCR	NEG	Culture					Enterovirus B	1	0	0	1
53	POS	EV throat/rectal PCR	NEG	EBV CSF PCR
53			NEG	CMV CSF PCR
56	NEG	EV CSF PCR	NEG	HSV CSF PCR	NEG	Culture	NEG	Cryptococcal Ag			Enterobacter spp.	0	1	1	2
56	POS	WNV IgM (CSF and serum) IgG (seroconverted convalescent serum)	NEG	VZV CSF PCR
56			NEG	HHV-6 CSF PCR
56			NEG	JC Virus PCR
56			NEG	CMV CSF PCR
57	POS	EV CSF PCR	NEG	HSV CSF PCR	NEG	Culture					Enterovirus B
57	NEG	WNV IgM/IgG										1	0	0	2
59	NEG	EV CSF PCR	NEG	HSV CSF PCR	NEG	Culture					NEG
59					POS	Mycoplasma Respiratory PCR						0	0	0	3
65	NEG	EV CSF PCR	NEG	HSV CSF PCR	NEG	Culture					NEG
69	NEG	EV CSF PCR	NEG	HSV CSF PCR	NEG	Culture					NEG	0	0	0	3
69					POS	Mycoplasma Respiratory PCR						0	0	0	3
74	POS	EV CSF PCR	NEG	HSV CSF PCR	NEG	Culture					Enterovirus B
74	POS	EV throat/rectal PCR										1	0	0	2
75	NEG	EV CSF PCR	POS	HSV CSF PCR	NEG	Culture					HSV 1
75					NEG	Mycoplasma Respiratory PCR						1	0	0	2
75					NEG	Rickettsia Serology
87	POS	EV CSF PCR			NEG	Culture					Enterovirus B
87												1	0	0	1
89	POS	EV throat/rectal PCR	NEG	HSV CSF PCR	NEG	Culture					Enterovirus A
89	NEG	EV CSF PCR										1	0	0	2
100	POS	EV CSF PCR			NEG	Culture					Enterovirus A
102	POS	EV CSF PCR			NEG	Culture					Enterovirus B	1	0	0	1
115	NEG	EV CSF PCR	NEG	HSV CSF PCR	NEG	Culture					NEG	1	0	0	1
115	NEG	WNV IgG/IgM			NEG	RPP						0	0	0	3
116	NEG	EV CSF PCR	NEG	HSV CSF PCR	NEG	Culture					NEG
116	POS	Viral Culture Rectal Swab: EV-A71										0	0	0	3
118	NEG	EV CSF PCR	NEG	HSV CSF PCR	NEG	Culture	NEG	Fungal Culture			NEG
118	NEG	CO tick fever virus serology	NEG	VZV CSF PCR	NEG	Mycoplasma CSF PCR	NEG	Histo Serology				0	0	0	4
118	NEG	HIV RNA PCR	NEG	CMV CSF PCR	NEG	Mycobacterial culture	NEG	Blasto Serology
118	NEG	WNV IgG/IgM	NEG	EBV CSF PCR	NEG	Bartonella Serology	NEG	Cocci Serology
118					NEG	Ehrlichia Serology	NEG	Cryptococcal Ag
118					NEG	Lyme Serology
118					NEG	Rickettsia Serology
118					NEG	RPR
119	NEG	EV CSF PCR	NEG	HSV CSF PCR	NEG	Culture	NEG	Fungal Culture			NEG
119	NEG	Parechovirus CSF PCR	NEG	VZV PCR	NEG	Mycobacterial Culture						0	0	0	4
119	NEG	WNV IgG/IgM	NEG	HHV-6 PCR	NEG	Mycoplasma CSF PCR
119	NEG	HIV RNA PCR	NEG	CMV CSF PCR	NEG	Bartonella Serology
											Totals	11	2	1	45
Abbreviations: NEG: negative, POS: positive, CSF: cerebrospinal fluid, EV: enterovirus, WNV: West Nile virus, HIV: human immunodeficiency virus, CO: Colorado, HSV: herpes simplex virus, VZV: varicella-zoster virus, EBV: Epstein-Barr virus, CMV: cytomegalovirus, HHV-6: human herpesvirus 6, Ag: antigen, TP: true positive, FP: false positive, FN: false negative, TN: true negative
		Summary Table	Clinical Result
		mNGS Result	Positive	Negative	Total
		Positive	11	2	13
		Negative	1	45	46
		Total	12	47	59
		Sensitivity	0.916667
		Specificity	0.957447
		Agreement	0.949153
